# Supplementary material for: Enantioselective addition of oxazolones to maleimides. An easy entry to quaternary aminoacids
Source: Royal Society of Chemistry journal article supplement (doi:10.1039/c1nj20659a), 2011-11-28

## Supporting Information

### CONTENTS

|                                   |    |
|-----------------------------------|----|
| General methods .....             | S2 |
| General procedure.....            | S2 |
| Compounds.....                    | S3 |
| NMR spectra and HPLC traces ..... | S4 |

## General methods.

Chemicals and solvents were either purchased *puriss p.A.* from commercial suppliers or purified by standard techniques. For thin-layer chromatography (TLC), silica gel plates Merck 60 F254 were used and compounds were visualized by irradiation with UV light and/or by treatment with a solution of phosphomolybdic acid (25 g),  $\text{Ce}(\text{SO}_4)_2 \cdot \text{H}_2\text{O}$  (10 g), conc.  $\text{H}_2\text{SO}_4$  (60 mL), and  $\text{H}_2\text{O}$  (940 mL) followed by heating or by treatment with a solution of *p*-anisaldehyde (23 mL), conc.  $\text{H}_2\text{SO}_4$  (35 mL), acetic acid (10 mL), and ethanol (900 mL) followed by heating. Flash chromatography was performed using silica gel Merck 60 (particle size 0.040-0.063 mm),  $^1\text{H}$  NMR,  $^{19}\text{F}$  NMR and  $^{13}\text{C}$  NMR spectra were recorded on Varian AS 400. Chemical shifts are given in ppm relative to tetramethylsilane (TMS) and the coupling constants  $J$  are given in Hz. The spectra were recorded in  $\text{CDCl}_3$  as solvent at room temperature. TMS served as internal standard ( $\delta = 0$  ppm) for  $^1\text{H}$  NMR,  $\text{CDCl}_3$  was used as internal standard ( $\delta = 77.0$  ppm) for  $^{13}\text{C}$  NMR and TFA was used as external standard for  $^{19}\text{F}$  NMR. High-resolution mass spectra were recorded on a Bruker MicroTOF spectrometer.

## General Procedure:

In a small flask, the desired oxazolone (0.30 mmol, 1.2 equiv), maleimide (0.25 mmol, 1.0 equiv) and catalyst  $(\text{DHQD})_2\text{PYR}$  (0.025 mmol, 0.1 equiv) in toluene (1 mL) were stirred at 4°C. Next, the crude was purified by column chromatography to afford the final compound.

## COMPOUNDS

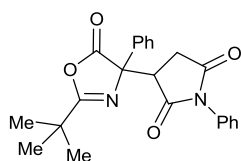

3-(2-*tert*-Butyl-5-oxo-4-phenyl-4,5-dihydrooxazol-4-yl)-1-phenylpyrrolidine-2,5-dione (**3a**)

Colorless oil.  $^1\text{H-NMR}$  (400 MHz.  $\text{CDCl}_3$ ,  $\text{TMS}_{\text{int}}$ ):  $\delta(\text{ppm})= 7.66\text{--}7.62$  (m, 2H), 7.47-7.36 (m, 6H), 7.24-7.20 (m, 2H), 3.81 (dd,  $J_1=4.1$  Hz,  $J_2=9.2$  Hz, 1H), 2.90 (dd,  $J_1=9.2$  Hz,  $J_2=18.2$  Hz, 1H), 2.44 (dd,  $J_1=4.1$  Hz,  $J_2=18.2$  Hz, 1H), 1.34 (s, 9H).  $^{13}\text{C-NMR}$  (100 MHz.  $\text{CDCl}_3$ ):  $\delta(\text{ppm})= 177.1, 173.5, 173.0, 172.8, 134.8, 131.6, 129.2, 129.0, 128.9, 128.8, 126.5, 126.0, 73.9, 47.1, 31.8, 26.7$ . **HRMS**  $[\text{M}+\text{H}]^+$ : Calculated for  $[\text{C}_{23}\text{H}_{23}\text{N}_2\text{O}_4]^+$ : 391.1652; found: 391.1653. **HPLC** (Chiralpak IC $^{\circ}$ ,  $1\text{mLmin}^{-1}$ , Hexane:IPA 80:20,  $254\text{ nm}^{-1}$ ):  $t_{\text{R}}= 7.7, 9.9$  min.  $[\alpha]_{\text{D}}^{25} = -30.2$  ( $c=1.0$ ,  $\text{CHCl}_3$ , 82% ee).

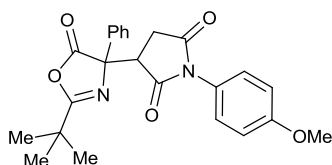

3-(2-*tert*-Butyl-5-oxo-4-phenyl-4,5-dihydrooxazol-4-yl)-1-(4-methoxyphenyl)pyrrolidine-2,5-dione (**3b**)

Colorless oil.  $^1\text{H-NMR}$  (400 MHz.  $\text{CDCl}_3$ ,  $\text{TMS}_{\text{int}}$ ):  $\delta(\text{ppm})= 7.66\text{--}7.62$  (m, 2H), 7.44-7.37 (m, 3H), 7.16-7.11 (m, 2H), 6.97-6.93 (m, 2H), 3.80 (s, 3H), 3.81-3.77 (m, 1H), 2.88 (dd,  $J_1=9.2$  Hz,  $J_2=18.3$  Hz, 1H), 2.43 (dd,  $J_1=4.1$  Hz,  $J_2=18.3$  Hz, 1H), 1.34 (s, 9H).  $^{13}\text{C-NMR}$  (100 MHz.  $\text{CDCl}_3$ ):  $\delta(\text{ppm})= 177.2, 173.8, 173.3, 172.7, 159.6, 134.9, 134.1, 129.5, 129.0, 128.9, 128.2, 127.7, 126.0, 114.5, 73.9, 55.5, 47.0, 31.8, 27.3, 26.7$ . **HRMS**  $[\text{M}+\text{H}]^+$ : Calculated for  $[\text{C}_{24}\text{H}_{25}\text{N}_2\text{O}_5]^+$ : 421.1758; found: 421.1764. **HPLC** (Chiralpak IA $^{\circ}$ ,  $1\text{mLmin}^{-1}$ , Hexane:IPA 85:15,  $254\text{ nm}^{-1}$ ):  $t_{\text{R}}= 15.2, 17.2$  min.  $[\alpha]_{\text{D}}^{25} = -39.3$  ( $c=1.0$ ,  $\text{CHCl}_3$ , 91% ee).

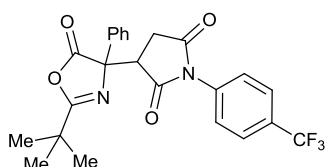

3-(2-*tert*-Butyl-5-oxo-4-phenyl-4,5-dihydrooxazol-4-yl)-1-(4-(trifluoromethyl)phenyl)pyrrolidine-2,5-dione (**3c**)

Colorless oil.  $^1\text{H-NMR}$  (400 MHz.  $\text{CDCl}_3$ ,  $\text{TMS}_{\text{int}}$ ):  $\delta(\text{ppm})= 7.74\text{--}7.69$  (m, 2H), 7.66-7.61 (m, 2H), 7.49-7.35 (m, 5H), 3.84 (dd,  $J_1=4.0$  Hz,  $J_2=9.2$  Hz, 1H), 2.94 (dd,  $J_1=9.2$  Hz,  $J_2=18.2$  Hz, 1H), 2.46 (dd,  $J_1=4.0$  Hz,  $J_2=18.2$  Hz, 1H), 1.34 (s, 9H).  $^{19}\text{F-NMR}$  (376 MHz.

CDCl<sub>3</sub>):  $\delta$ (ppm)= -63.2 (s, 3F). <sup>13</sup>C-NMR (100 MHz, CDCl<sub>3</sub>):  $\delta$ (ppm)= 177.7, 177.0, 173.0, 172.6, 134.6, 129.7, 129.5, 129.1, 128.9, 128.2, 127.2, 127.1, 126.7, 126.5, 126.4, 126.3, 126.2, 126.0, 73.9, 47.1, 31.9, 27.0, 26.7. **HRMS [M+H]<sup>+</sup>**: Calculated for [C<sub>24</sub>H<sub>22</sub>F<sub>3</sub>N<sub>2</sub>O<sub>4</sub>]<sup>+</sup>: 459.1526; found: 459.1521. **HPLC** (Chiralpak IB<sup>®</sup>, 1mLmin<sup>-1</sup>, Hexane:IPA 90:10, 254 nm<sup>-1</sup>): t<sub>R</sub>= 10.3, 19.5 min. [ $\alpha$ ]<sub>D</sub><sup>25</sup> = -21.2 (c=0.4, CHCl<sub>3</sub>, 52% ee).

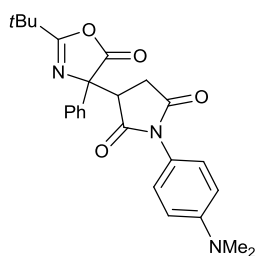

3-(2-(*tert*-Butyl)-5-oxo-4-phenyl-4,5-dihydrooxazol-4-yl)-1-(4-(dimethylamino)phenyl)pyrrolidine-2,5-dione (**3d**)

Colorless oil. <sup>1</sup>H NMR (300 MHz, CDCl<sub>3</sub>, TMS<sub>int</sub>):  $\delta$ (ppm)= 7.66-7.62 (m, 2H), 7.44-7.36 (m, 3H), 7.04 (d, J=9.1 Hz, 2H), 6.72 (d, J=9.1 Hz, 2H), 3.76 (dd, J<sub>1</sub>=4.2 Hz, J<sub>2</sub>=9.1 Hz, 1H), 2.95 (s, 6H), 2.85 (dd, J<sub>1</sub>=9.1 Hz, J<sub>2</sub>=18.3 Hz, 1H), 2.44 (dd, J<sub>1</sub>=4.2 Hz, J<sub>2</sub>=18.3 Hz, 1H), 1.34 (s, 3H). <sup>13</sup>C NMR (100 MHz, CDCl<sub>3</sub>): 178.7, 176.6, 175.7, 175.1, 152.0, 136.5, 130.7, 130.4, 130.3, 128.8, 128.6, 127.6, 113.9, 75.4, 48.5, 41.9, 33.2, 28.6, 28.2. **HRMS [M+Na]<sup>+</sup>**: Calculated for [C<sub>25</sub>H<sub>27</sub>N<sub>3</sub>NaO<sub>4</sub>]<sup>+</sup> is 456.1894; found: 456.1887. **HPLC** (Chiralpak<sup>®</sup> IB, 1mLmin<sup>-1</sup>, Hexane:IPA 90:10, 254 nm<sup>-1</sup>): t<sub>R</sub>= 26.5, 29.7 min (maj.). [ $\alpha$ ]<sub>D</sub><sup>25</sup> = -18.5 (c=0.9, CHCl<sub>3</sub>, 50% ee).

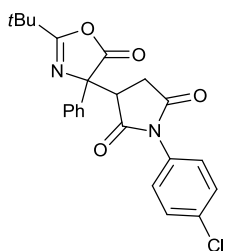

3-(2-(*tert*-Butyl)-5-oxo-4-phenyl-4,5-dihydrooxazol-4-yl)-1-(4-chlorophenyl)pyrrolidine-2,5-dione (**3e**)

Colorless oil. <sup>1</sup>H NMR (300 MHz, CDCl<sub>3</sub>, TMS<sub>int</sub>):  $\delta$ (ppm)= 7.63 (m, 2H), 7.43-7.40 (m, 5H), 7.19 (m, 2H), 3.81 (dd, J<sub>1</sub>=4.0 Hz, J<sub>2</sub>=9.1 Hz, 1H), 2.91 (dd, J<sub>1</sub>=9.1 Hz, J<sub>2</sub>=18.1 Hz, 1H), 2.44 (dd, J<sub>1</sub>=4.0 Hz, J<sub>2</sub>=18.1 Hz, 1H), 1.34 (s, 3H). <sup>13</sup>C NMR (100 MHz, CDCl<sub>3</sub>): 178.6, 174.8, 174.5, 174.4, 136.3, 136.1, 131.6, 131.1, 130.9, 130.8, 130.6, 130.5, 129.6, 129.3, 127.6, 75.4, 48.6, 33.4, 28.7, 28.3. **HRMS [M+H]<sup>+</sup>**: Calculated for [C<sub>23</sub>H<sub>22</sub>ClN<sub>2</sub>O<sub>4</sub>]<sup>+</sup> is 425.1263; found: 425.1258. **HPLC** (Chiralpak<sup>®</sup> IB, 1mLmin<sup>-1</sup>, Hexane:IPA 90:10, 254 nm<sup>-1</sup>): t<sub>R</sub>= 11.6, 20.0 min (maj.). [ $\alpha$ ]<sub>D</sub><sup>25</sup> = -22.1 (c=1.1, CHCl<sub>3</sub>, 77% ee).

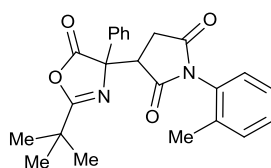

3-(2-*tert*-Butyl-5-oxo-4-phenyl-4,5-dihydrooxazol-4-yl)-1-*o*-tolylpyrrolidine-2,5-dione (**3f**)

Colorless oil. Mixture of diastereoisomers, d.r.=2:1  $^1\text{H-NMR}$  (400 MHz.  $\text{CDCl}_3$ ,  $\text{TMS}_{\text{int}}$ ):  $\delta(\text{ppm})= 7.67\text{--}7.63$  (m, 4H), 7.45-7.35 (m, 7H), 7.32-7.27 (m, 4H), 7.25-7.20 (m, 1H), 7.12-7.08 (m, 1H), 6.95-6.99 (m, 1H), 3.87 (dd,  $J_1=4.7$  Hz,  $J_2=9.4$  Hz, 1H), 3.85 (dd,  $J_1=3.9$  Hz,  $J_2=9.2$  Hz, 1H), 2.95 (dd,  $J_1=9.2$  Hz,  $J_2=18.2$  Hz, 1H), 2.90 (dd,  $J_1=9.4$  Hz,  $J_2=18.3$  Hz, 1H), 2.49-2.42 (m, 2H), 2.24 (s, 3H), 2.08 (s, 3H), 1.36 (s, 9H), 1.35 (s, 2H).  $^{13}\text{C-NMR}$  (100 MHz.  $\text{CDCl}_3$ ):  $\delta(\text{ppm})= 177.2, 177.1, 173.5, 173.4, 173.0, 172.9, 172.8, 136.1, 135.5, 135.0, 134.8, 131.2, 131.0, 130.8, 130.6, 129.6, 129.5, 129.0, 128.9, 128.9, 128.9, 127.9, 127.0, 126.7, 126.0, 126.0, 74.0, 73.7, 47.3, 47.0, 34.5, 32.0, 31.8, 26.8, 26.7, 17.7, 17.6$ .  $\text{HRMS } [\text{M}+\text{H}]^+$ : Calculated for  $[\text{C}_{24}\text{H}_{25}\text{N}_2\text{O}_4]^+$ : 405.1809; found: 405.1805.  $\text{HPLC}$  (Chiralpak IB $^{\text{®}}$ ,  $1\text{ mLmin}^{-1}$ , Hexane:IPA 90:10,  $254\text{ nm}^{-1}$ ):  $t_{\text{R}}= 10.0, 14.9$  min.

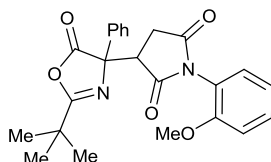

3-(2-*tert*-Butyl-5-oxo-4-phenyl-4,5-dihydrooxazol-4-yl)-1-(2-methoxyphenyl)pyrrolidine-2,5-dione (**3g**)

Colorless oil. Mixture of diastereoisomers, d.r.=2:1  $^1\text{H-NMR}$  (400 MHz.  $\text{CDCl}_3$ ,  $\text{TMS}_{\text{int}}$ ):  $\delta(\text{ppm})= 7.70\text{--}7.62$  (m, 4H), 7.45-7.34 (m, 8H), 7.13-7.10 (m, 1H), 7.06-9.94 (m, 5H), 3.85 (dd,  $J_1=4.2$  Hz,  $J_2=9.4$  Hz, 1H), 3.83 (s, 3H), 3.81 (dd,  $J_1=5.7$  Hz,  $J_2=9.1$  Hz, 1H), 3.74 (s, 3H), 2.93 (dd,  $J_1=9.4$  Hz,  $J_2=18.2$  Hz, 1H), 2.77 (dd,  $J_1=9.1$  Hz,  $J_2=18.1$  Hz, 1H), 2.67 (dd,  $J_1=5.7$  Hz,  $J_2=18.1$  Hz, 1H), 2.44 (dd,  $J_1=4.2$  Hz,  $J_2=18.2$  Hz, 1H), 1.35 (s, 9H), 1.35 (s, 9H).  $^{13}\text{C-NMR}$  (100 MHz.  $\text{CDCl}_3$ ):  $\delta(\text{ppm})= 177.2, 176.9, 173.5, 173.4, 173.0, 172.8, 172.6, 171.9, 154.6, 135.0, 130.8, 129.2, 128.9, 128.8, 126.1, 126.1, 120.9, 111.9, 73.9, 73.2, 55.7, 47.2, 31.4, 26.7$ .  $\text{HPLC}$  (Chiralpak IB $^{\text{®}}$ ,  $0.8\text{ mLmin}^{-1}$ , Hexane:IPA 95:5,  $254\text{ nm}^{-1}$ ):  $t_{\text{R}}(\text{majoritary diastereomer})= 31.8, 38.2$  min.  $\text{HRMS } [\text{M}+\text{H}]^+$ : Calculated for  $[\text{C}_{24}\text{H}_{25}\text{N}_2\text{O}_5]^+$ : 421.1758; found: 421.1755.

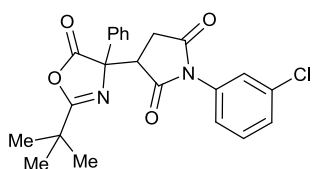

3-(2-*tert*-Butyl-5-oxo-4-phenyl-4,5-dihydrooxazol-4-yl)-1-(3-chlorophenyl)pyrrolidine-2,5-dione (**3i**)

Colorless oil.  $^1\text{H-NMR}$  (300 MHz.  $\text{CDCl}_3$ ,  $\text{TMS}_{\text{int}}$ ):  $\delta(\text{ppm})= 7.69\text{--}7.64$  (m, 2H), 7.47-7.38 (m, 5H), 7.31-7.28 (m, 1H), 7.22-7.16 (m, 1H), 3.84 (dd,  $J_1=4.1$  Hz,  $J_2=9.2$  Hz, 1H), 2.95 (dd,  $J_1=9.2$  Hz,  $J_2=18.3$  Hz, 1H), 2.46 (dd,  $J_1=4.1$  Hz,  $J_2=18.3$  Hz, 1H), 1.38 (s, 9H).  $^{13}\text{C-NMR}$  (100 MHz.  $\text{CDCl}_3$ ):  $\delta(\text{ppm})= 183.1, 177.7, 173.8, 170.5, 135.9, 134.9, 132.5, 130.3, 130.1, 129.7, 129.6, 129.4, 129.4, 129.1, 129.0, 128.9, 127.1, 126.8, 126.0, 125.0, 124.7, 69.9, 47.9, 31.9, 27.0, 26.7$ . **HPLC** (Chiralpak IB<sup>®</sup>, 1 mLmin<sup>-1</sup>, Hexane:IPA 90:10, 254 nm<sup>-1</sup>):  $t_{\text{R}}= 10.0, 14.2$  min. **HRMS** [ $\text{M}+\text{H}$ ]<sup>+</sup>: Calculated for  $[\text{C}_{23}\text{H}_{22}\text{ClN}_2\text{O}_4]^+$ : 425.1263; found: 425.1259.  $[\alpha]_{\text{D}}^{25} = -43.0$  ( $c=0.9$ ,  $\text{CHCl}_3$ , 70% ee).

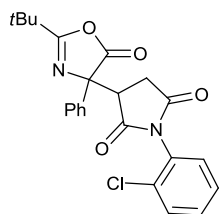

3-(2-(*tert*-Butyl)-5-oxo-4-phenyl-4,5-dihydrooxazol-4-yl)-1-(2-chlorophenyl)pyrrolidine-2,5-dione (**3h**)

Colorless oil.  $^1\text{H NMR}$  (300 MHz.  $\text{CDCl}_3$ ,  $\text{TMS}_{\text{int}}$ ):  $\delta(\text{ppm})= 8.36$  (d,  $J=7.2$  Hz, 2H), 7.56-7.45 (m, 3H), 7.41-7.36 (m, 1H), 7.32-7.27 (m, 1H), 6.88 (dd,  $J_1=8.3$  Hz,  $J_2=2.5$  Hz, 1H), 6.73-6.69 (m, 1H), 6.64-6.63 (m, 1H), 4.06-4.00 (dd,  $J_1=9.0$  Hz,  $J_2=6.4$  Hz, 1H), 3.28-3.09 (m, 2H), 1.35 (s, 3H).  $^{13}\text{C NMR}$  (100 MHz.  $\text{CDCl}_3$ ): 184.5, 178.8, 174.8, 172.1, 132.5, 131.6, 131.5, 131.1, 131.0, 130.8, 129.9, 129.7, 129.6, 129.3, 128.0, 127.3, 71.4, 49.5, 33.5, 28.5, 27.7. **HRMS** [ $\text{M}+\text{H}_2\text{O}$ ]<sup>+</sup>: Calculated for  $[\text{C}_{23}\text{H}_{24}\text{ClN}_2\text{O}_5]^+$  is 443.1368; found: 443.1356. **HPLC** (Chiralpak<sup>®</sup> IB, 1mLmin<sup>-1</sup>, Hexane:IPA 90:10, 254 nm<sup>-1</sup>):  $t_{\text{R}}= 15.0, 17.9$  min (maj.).  $[\alpha]_{\text{D}}^{25} = -15.2$  ( $\text{CHCl}_3$ ,  $c=1.25$ , 56% ee).

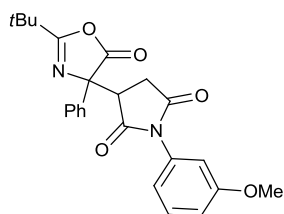

3-(2-(*tert*-Butyl)-5-oxo-4-phenyl-4,5-dihydrooxazol-4-yl)-1-(2-methoxyphenyl)pyrrolidine-2,5-dione (**3j**)

Colorless oil.  $^1\text{H NMR}$  (300 MHz.  $\text{CDCl}_3$ ,  $\text{TMS}_{\text{int}}$ ):  $\delta(\text{ppm})= 8.36$  (d,  $J=7.2$  Hz, 2H), 7.56-7.45 (m, 3H), 7.41-7.36 (m, 1H), 7.32-7.27 (m, 1H), 6.88 (dd,  $J_1=8.3$  Hz,  $J_2=2.5$  Hz, 1H), 6.73-6.69 (m, 1H), 6.64-6.63 (m, 1H), 4.06-4.00 (dd,  $J_1=9.0$  Hz,  $J_2=6.4$  Hz, 1H), 3.73 (s, 3H), 3.28-3.09 (m, 2H), 1.17 (s, 3H).  $^{13}\text{C-NMR}$  (100 MHz.  $\text{CDCl}_3$ ):  $\delta(\text{ppm})= 180.9, 178.7, 178.2, 174.8, 134.1, 131.4, 130.3, 130.3, 120.1, 116.4, 113.5,$

56.8, 45.8, 42.0, 34.6, 32.3, 31.1, 27.7, 27.6. **HRMS**  $[M+H]^+$ : Calculated for  $[C_{23}H_{22}ClN_2O_4]^+$  is 425.1758; found: 425.1752. **HPLC** (Chiralpak<sup>®</sup> IB, 1 mL min<sup>-1</sup>, Hexane:IPA 90:10, 254 nm<sup>-1</sup>):  $t_R$  = 15.1, 17.9 min (maj.).  $[\alpha]_D^{25} = -4.9$  (CHCl<sub>3</sub>, c=0.36, 84% ee).

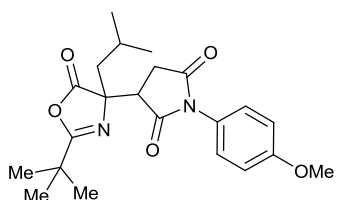

3-(2-*tert*-Butyl-4-isobutyl-5-oxo-4,5-dihydrooxazol-4-yl)-1-(4-methoxyphenyl)pyrrolidine-2,5-dione (**3k**)

Colorless oil. **<sup>1</sup>H-NMR** (400 MHz, CDCl<sub>3</sub>, TMS<sub>int</sub>):  $\delta$ (ppm)= 7.08-7.03 (m, 2H), 6.96-6.92 (m, 2H), 3.90 (dd,  $J_1=6.5$  Hz,  $J_2=8.6$  Hz, 1H), 3.80 (s, 3H), 3.11-3.06 (m, 2H), 2.55-2.51 (m, 2H), 2.31-2.20 (m, 1H), 1.11 (s, 9H), 1.05-1.00 (m, 6H). **<sup>13</sup>C-NMR** (100 MHz, CDCl<sub>3</sub>):  $\delta$ (ppm)= 173.7, 173.4, 165.2, 163.4, 159.6, 127.6, 123.9, 114.5, 108.6, 73.4, 55.4, 44.0, 39.9, 36.7, 33.0, 26.2, 26.0, 22.8, 22.7. **HPLC** (Chiralpak IB<sup>®</sup>, 1 mL min<sup>-1</sup>, Hexane:IPA 90:10, 254 nm<sup>-1</sup>):  $t_R$  = 18.0, 43.5 min. **HRMS**  $[M+H]^+$ : Calculated for  $[C_{22}H_{29}N_2O_5]^+$ : 401.2071; found: 401.2075.  $[\alpha]_D^{25} = -13.7$  (c=1.0, CHCl<sub>3</sub>, 81% ee).

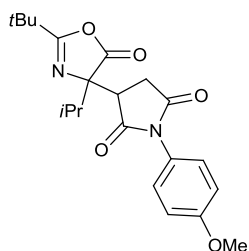

3-(2-(*tert*-Butyl)-4-isopropyl-5-oxo-4,5-dihydrooxazol-4-yl)-1-(4-methoxyphenyl)pyrrolidine-2,5-dione (**3l**)

Colorless oil. **<sup>1</sup>H NMR** (400 MHz, CDCl<sub>3</sub>, TMS<sub>int</sub>):  $\delta$ (ppm)= 7.04 (d,  $J=8.8$  Hz, 2H), 6.93 (d,  $J=8.9$  Hz, 2H), 3.83-3.78 (m: s+dd, 4H), 3.40 (dd,  $J_1=17.7$  Hz,  $J_2=6.6$  Hz, 1H), 3.09 (dd,  $J_1=17.7$  Hz,  $J_2=9.3$  Hz, 1H), 3.00 (h,  $J=6.9$  Hz, 1H), 1.22 (d,  $J=6.8$  Hz, 3H), 1.19 (d,  $J=6.8$  Hz, 3H), 1.09 (s, 3H). **<sup>13</sup>C NMR** (100 MHz, CDCl<sub>3</sub>): 175.1, 175.1, 172.9, 160.8, 128.6, 125.1, 115.8, 109.2, 78.4, 56.7, 44.5, 40.9, 34.3, 30.9, 29.3, 26.9, 20.6, 20.5. **HRMS**  $[M+H]^+$ : Calculated for  $[C_{21}H_{27}N_2O_5]^+$  is 387.1914; found: 387.1914. **HPLC** (Chiralpak<sup>®</sup> IB, 1 mL min<sup>-1</sup>, Hexane:IPA 90:10, 254 nm<sup>-1</sup>):  $t_R$  = 12.9, 16.9 min (maj.).  $[\alpha]_D^{25} = -8.1$  (CHCl<sub>3</sub>, c=1.1, 86% ee).

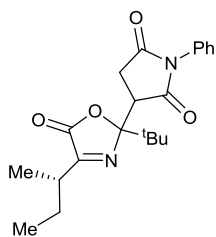

**3-(4-sec-Butyl-2-tert-butyl-5-oxo-2,5-dihydrooxazol-2-yl)-1-phenylpyrrolidine-2,5-dione (4m)**

White solid. Mixture of diastereoisomers, d.r.=1,6:1. **<sup>1</sup>H-NMR** (400 MHz, CDCl<sub>3</sub>, TMS<sub>int</sub>): δ(ppm)= 7.45-7.33 (m, 6H), 7.16-7.10 (m, 4H), 3.95-3.88 (m, 2H), 3.08-3.03 (m, 4H), 2.85-2.75 (m, 2H), 1.95-1.78 (m, 2H), 1.62-1.50 (m, 2H), 1.27-1.23 (m, 6H), 1.10-1.08 (m, 18H), 1.00-0.94 (m, 6H). **<sup>13</sup>C-NMR** (100 MHz, CDCl<sub>3</sub>): δ(ppm)=173.6, 173.5, 173.0, 172.9, 167.2, 164.5, 164.4, 131.4, 129.1, 129.1, 128.7, 126.4, 126.2, 108.2, 108.0, 44.1, 44.0, 39.8, 35.0, 34.7, 32.9, 26.4, 26.1, 25.6, 25.6, 16.4, 16.2, 11.8, 11.7. **HRMS [M+H]<sup>+</sup>**: Calculated for [C<sub>21</sub>H<sub>27</sub>N<sub>2</sub>O<sub>4</sub>]<sup>+</sup>: 371.1965; found: 371.1970.



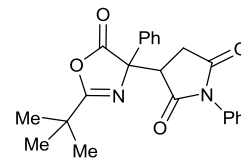

3-(2-*tert*-Butyl-5-oxo-4-phenyl-4,5-dihydrooxazol-4-yl)-1-phenylpyrrolidine-2,5-dione (**3a**)

### <sup>1</sup>H-NMR

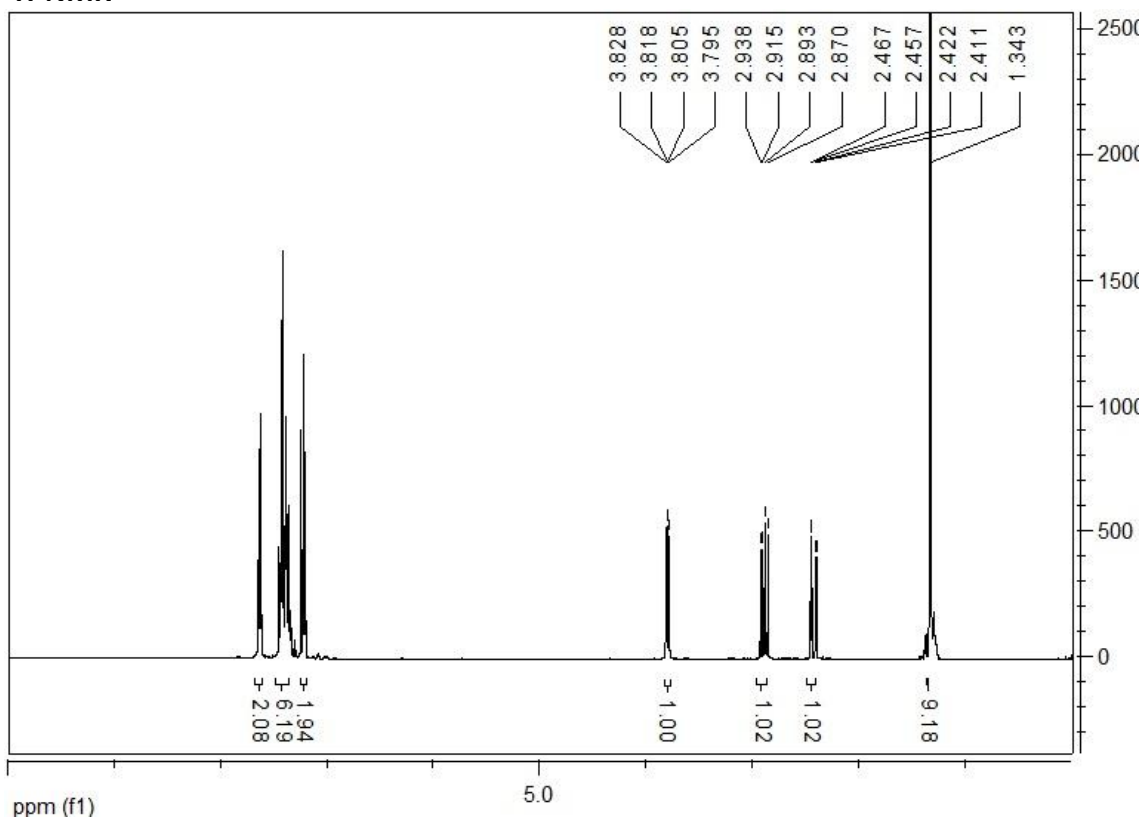

### <sup>13</sup>C-NMR

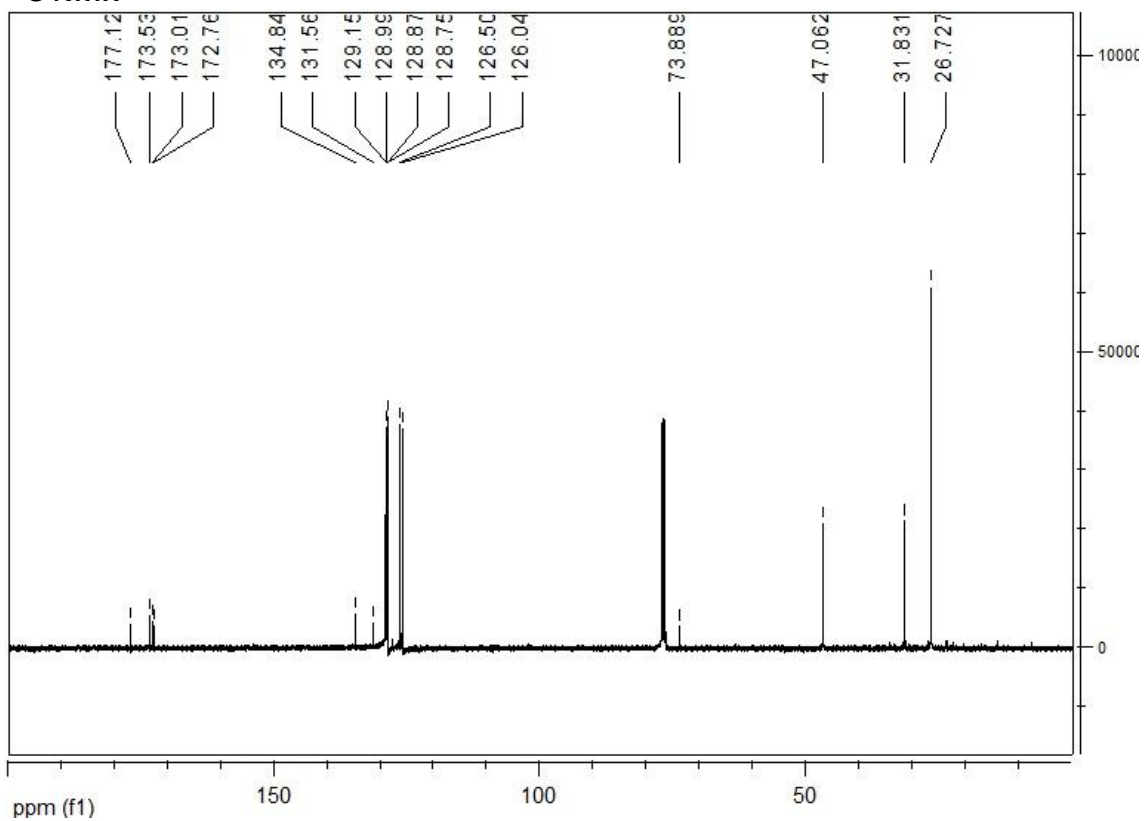

### HPLC

Racemic:

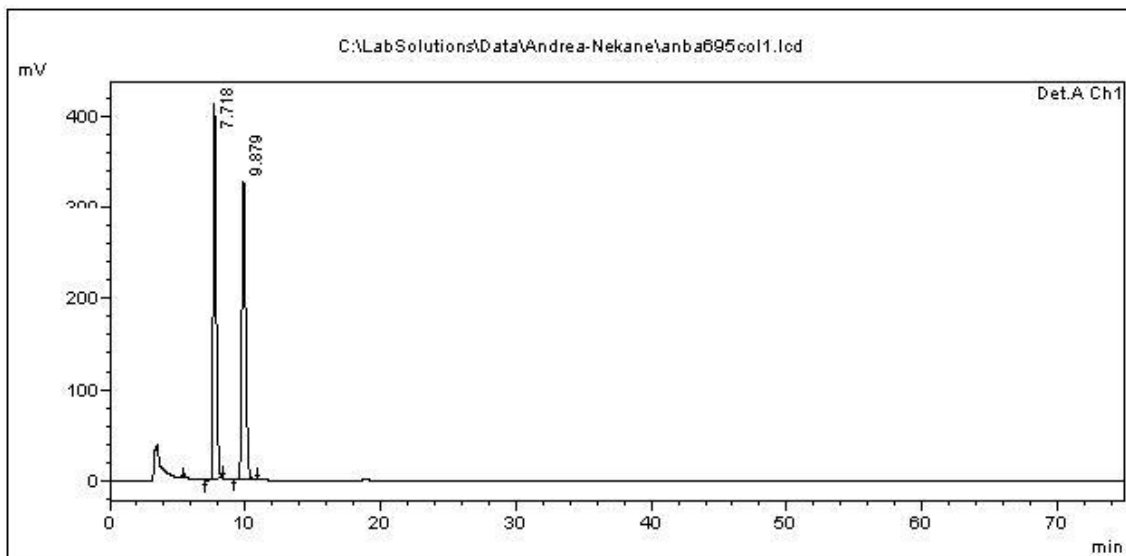

| Peak# | Ret. Time | Area     | Height | Area %  | Height % |
|-------|-----------|----------|--------|---------|----------|
| 1     | 7.718     | 6305089  | 411632 | 49.977  | 55.728   |
| 2     | 9.879     | 6310974  | 327011 | 50.023  | 44.272   |
| Total |           | 12616063 | 738643 | 100.000 | 100.000  |

Chiral:

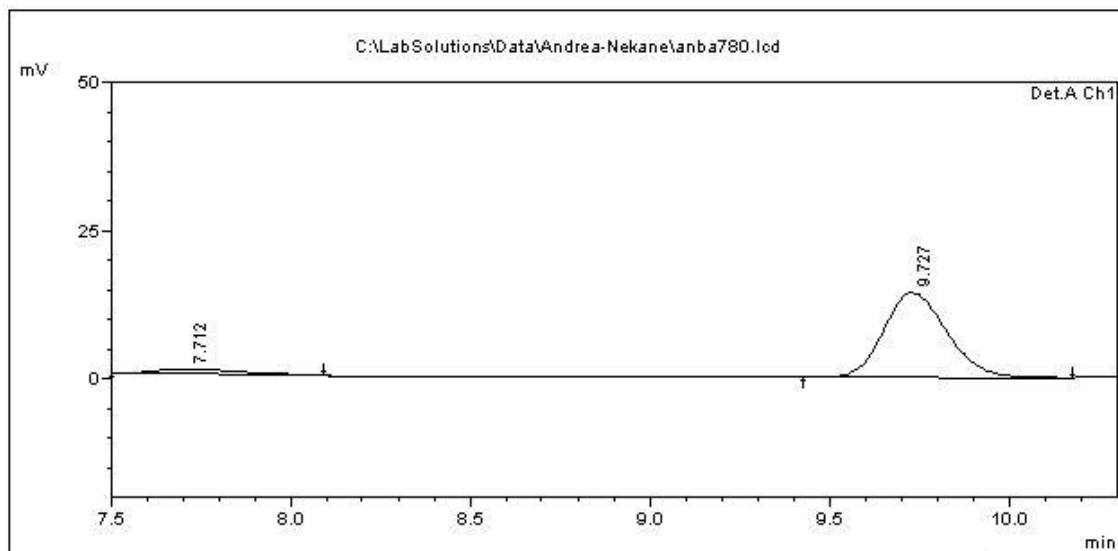

| Peak# | Ret. Time | Area   | Area %  |
|-------|-----------|--------|---------|
| 1     | 7.712     | 12548  | 6.814   |
| 2     | 9.727     | 171616 | 93.186  |
| Total |           | 184164 | 100.000 |

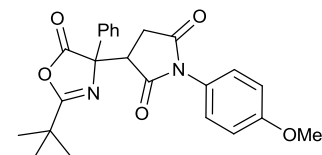

3-(2-*tert*-Butyl-5-oxo-4-phenyl-4,5-dihydrooxazol-4-yl)-1-(4-methoxyphenyl)pyrrolidine-2,5-dione (**3b**)

### <sup>1</sup>H-NMR

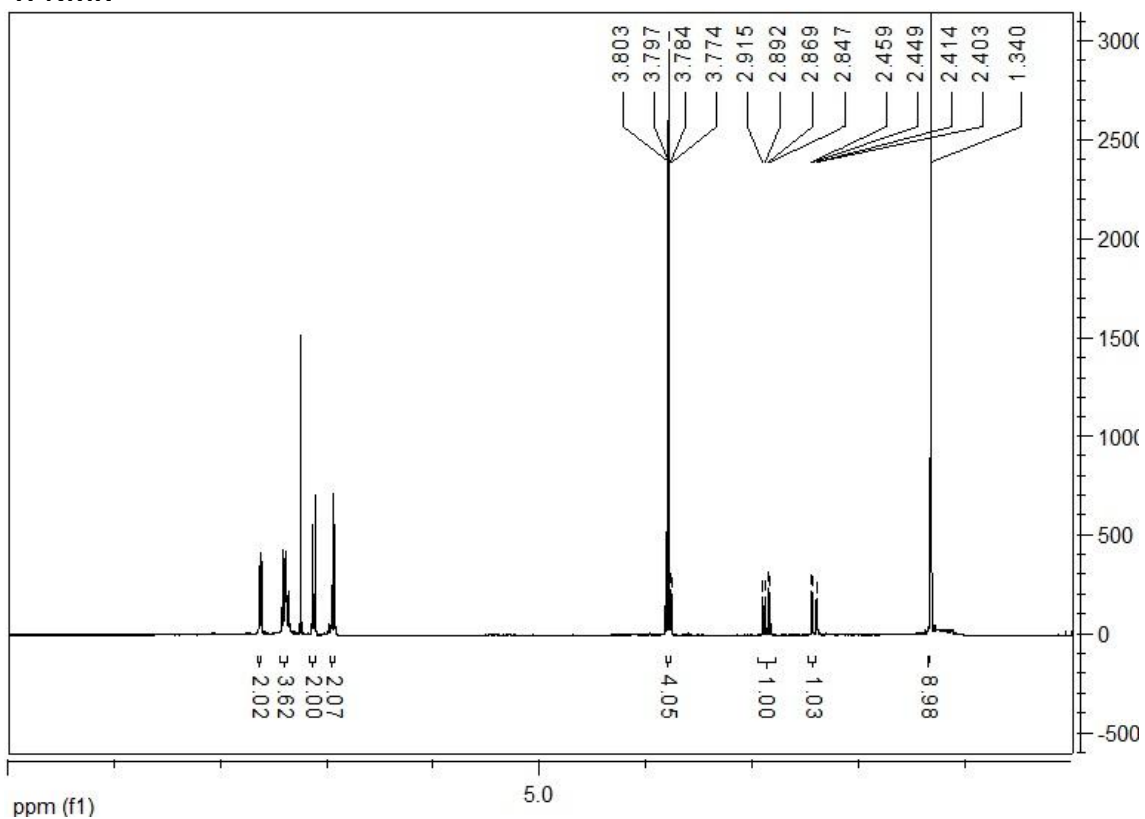

### <sup>13</sup>C-NMR

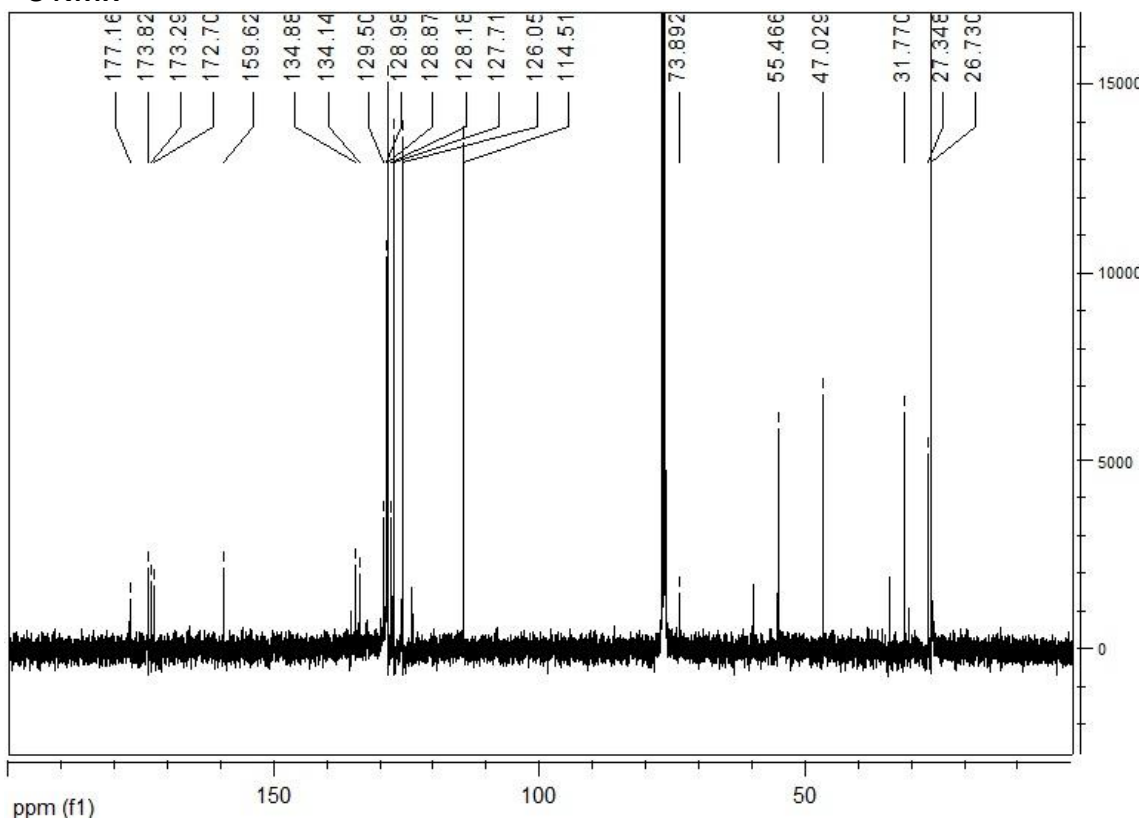

### HPLC:

Racemic:

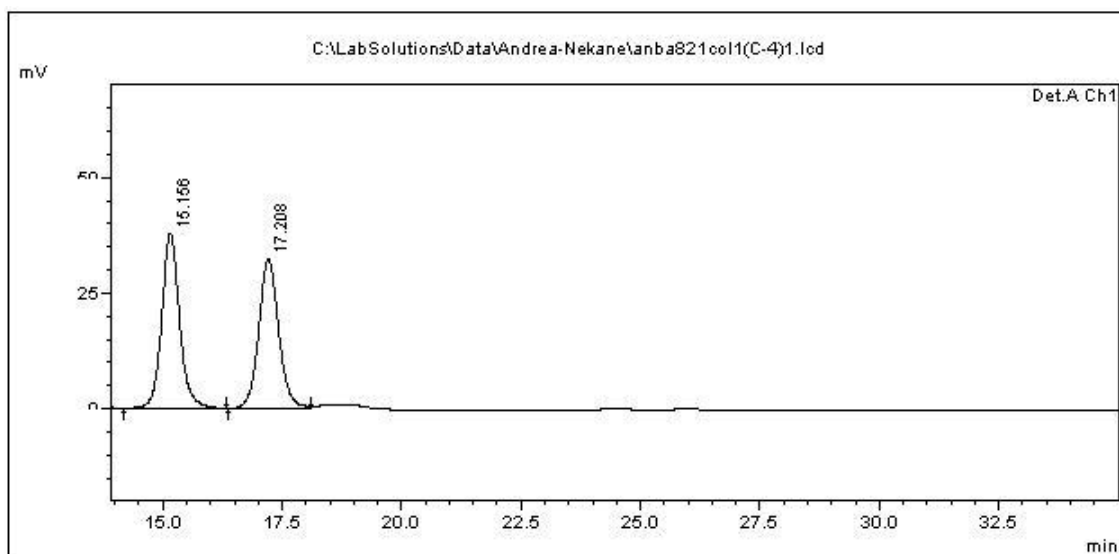

PeakTable

Detector A Ch1 254nm

| Peak# | Ret. Time | Area    | Area %  |
|-------|-----------|---------|---------|
| 1     | 15.156    | 977067  | 50.999  |
| 2     | 17.208    | 938772  | 49.001  |
| Total |           | 1915839 | 100.000 |

Chiral:

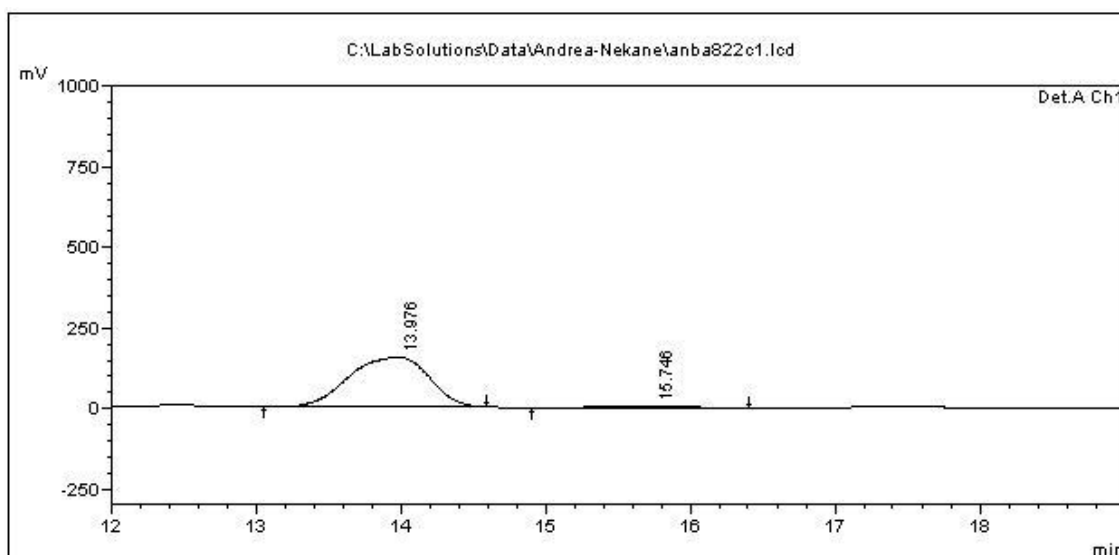

PeakTable

Detector A Ch1 254nm

| Peak# | Ret. Time | Area    | Area %  |
|-------|-----------|---------|---------|
| 1     | 13.976    | 5964446 | 95.720  |
| 2     | 15.746    | 266714  | 4.280   |
| Total |           | 6231160 | 100.000 |



### <sup>19</sup>F-NMR

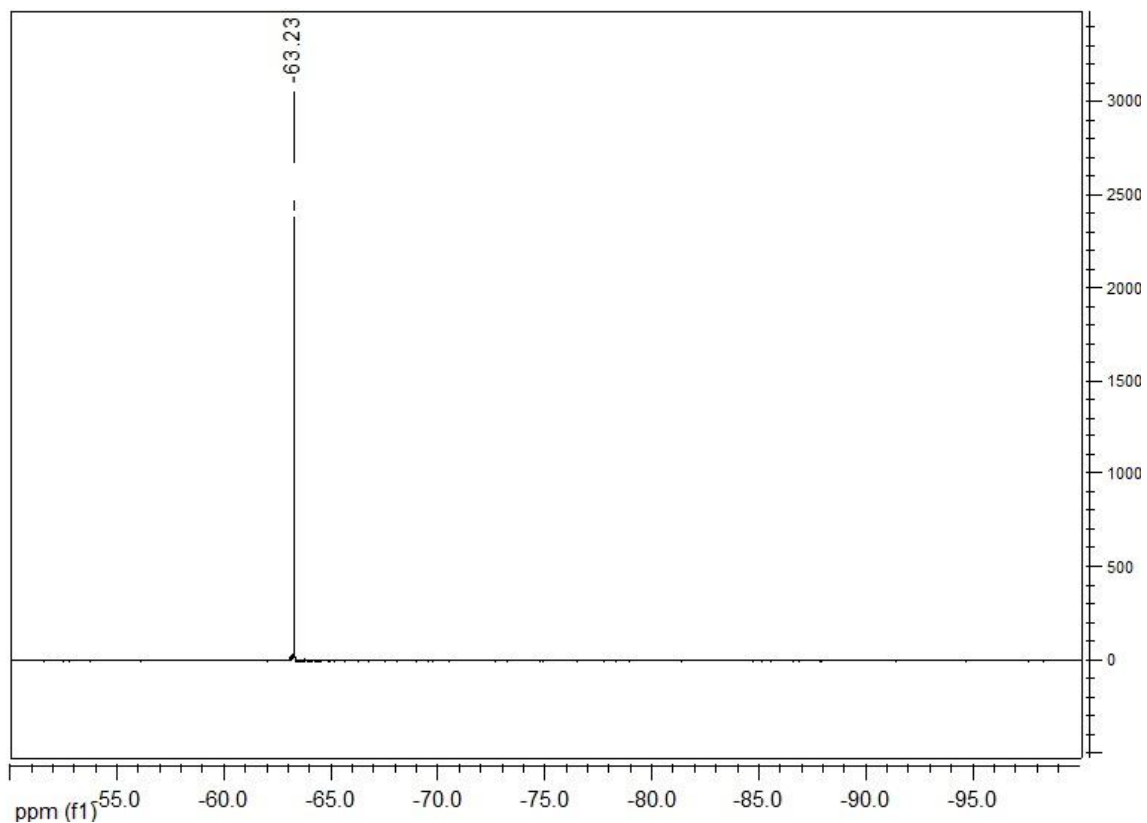

### HPLC:

Racemic:

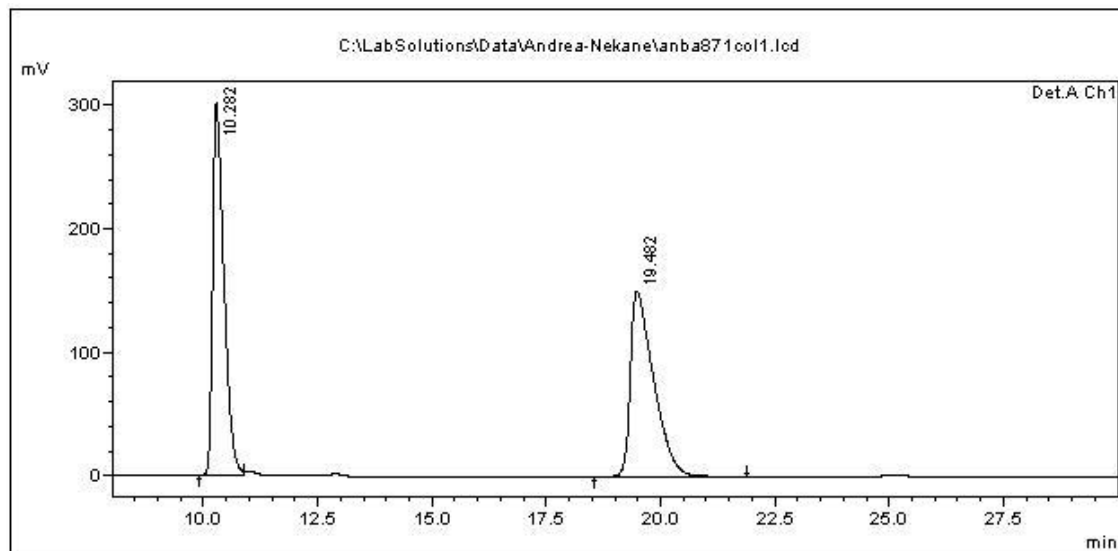

PeakTable

Detector A Ch1 254nm

| Peak# | Ret. Time | Area     | Area %  |
|-------|-----------|----------|---------|
| 1     | 10.282    | 5202654  | 49.569  |
| 2     | 19.482    | 5293090  | 50.431  |
| Total |           | 10495744 | 100.000 |

Chiral:

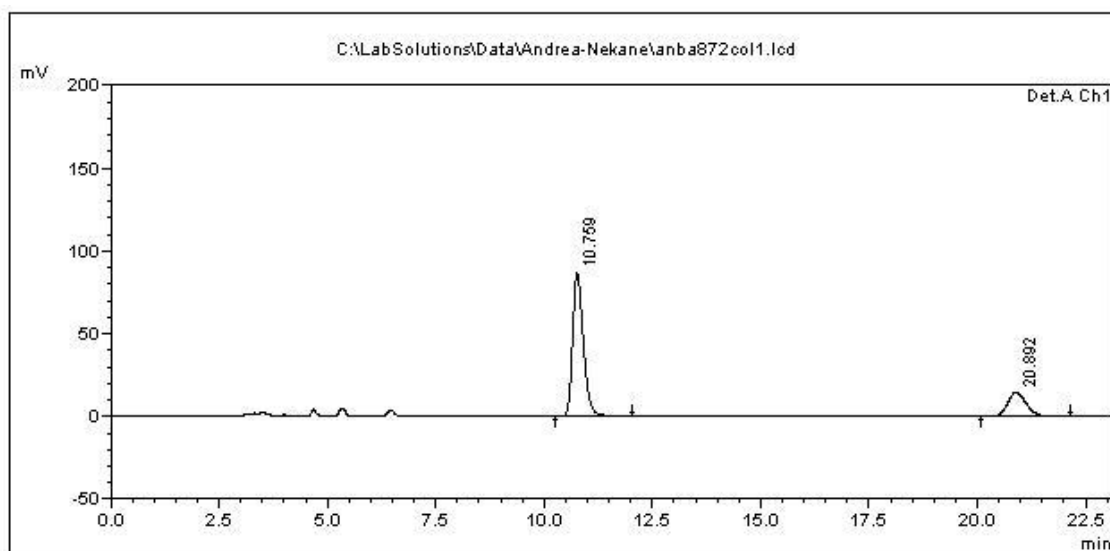

| Peak# | Ret. Time | Area    | Area %  |
|-------|-----------|---------|---------|
| 1     | 10.759    | 1490864 | 76.774  |
| 2     | 20.892    | 451025  | 23.226  |
| Total |           | 1941889 | 100.000 |

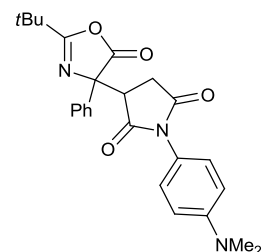

3-(2-(*tert*-Butyl)-5-oxo-4-phenyl-4,5-dihydrooxazol-4-yl)-1-(4-(dimethylamino)phenyl)pyrrolidine-2,5-dione (**3d**)

### <sup>1</sup>H-NMR

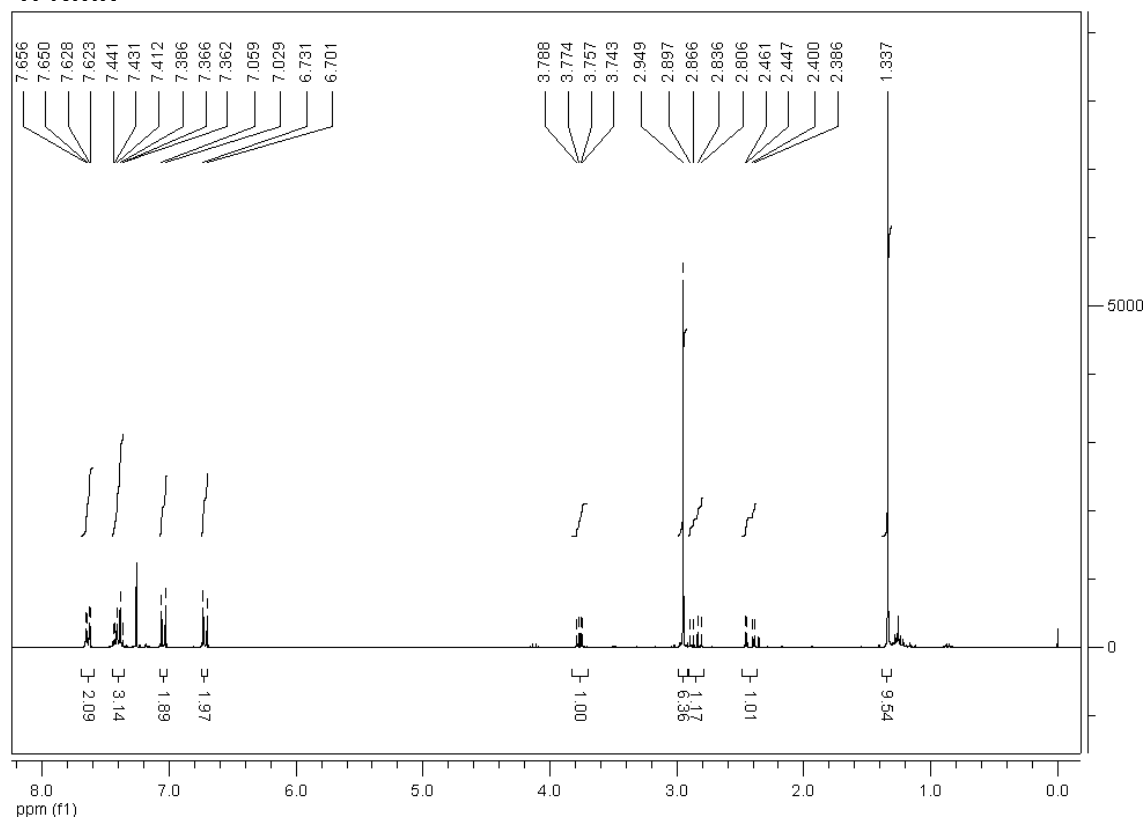

### <sup>13</sup>C-NMR

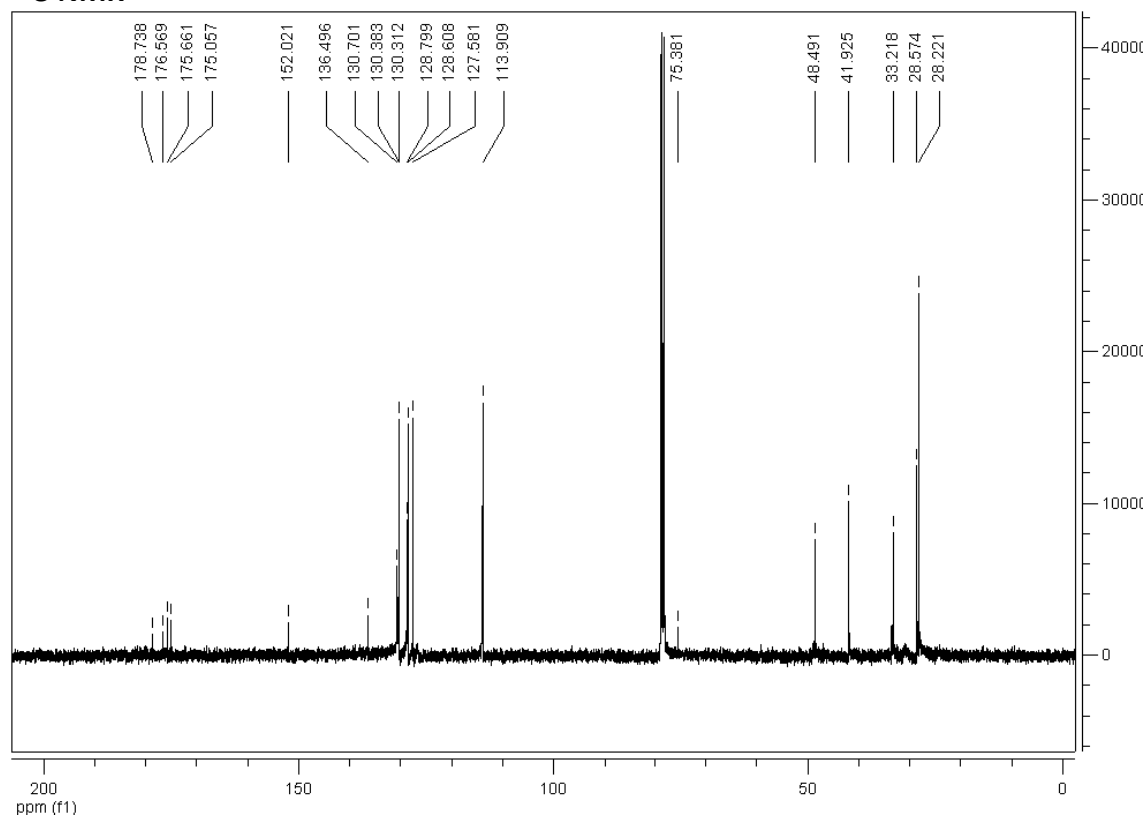



### HPLC:

Racemic:

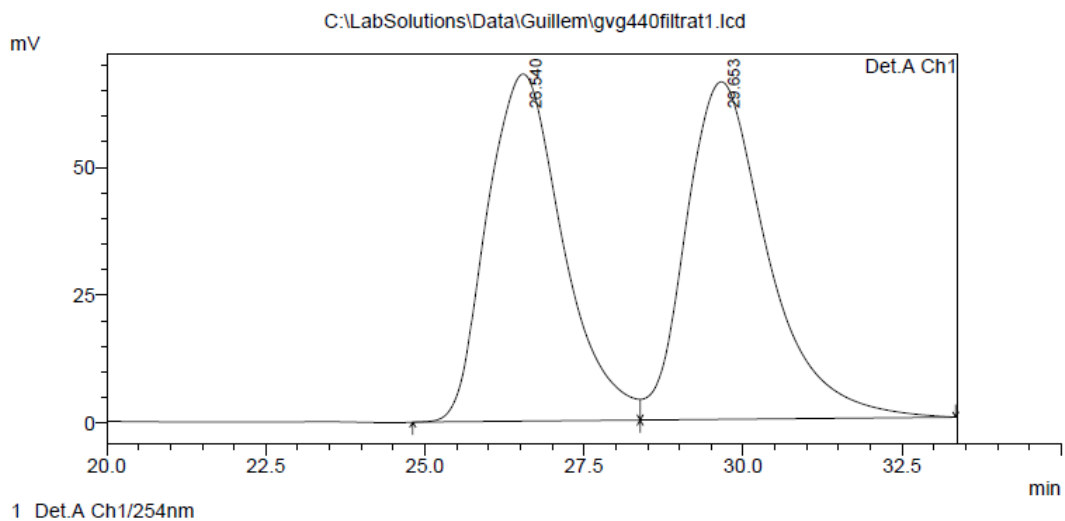

PeakTable

| Peak# | Ret. Time | Area     | Height | Area %  | Height % |
|-------|-----------|----------|--------|---------|----------|
| 1     | 26.540    | 5616614  | 67799  | 48.742  | 50.698   |
| 2     | 29.653    | 5906632  | 65933  | 51.258  | 49.302   |
| Total |           | 11523246 | 133732 | 100.000 | 100.000  |

Chiral:

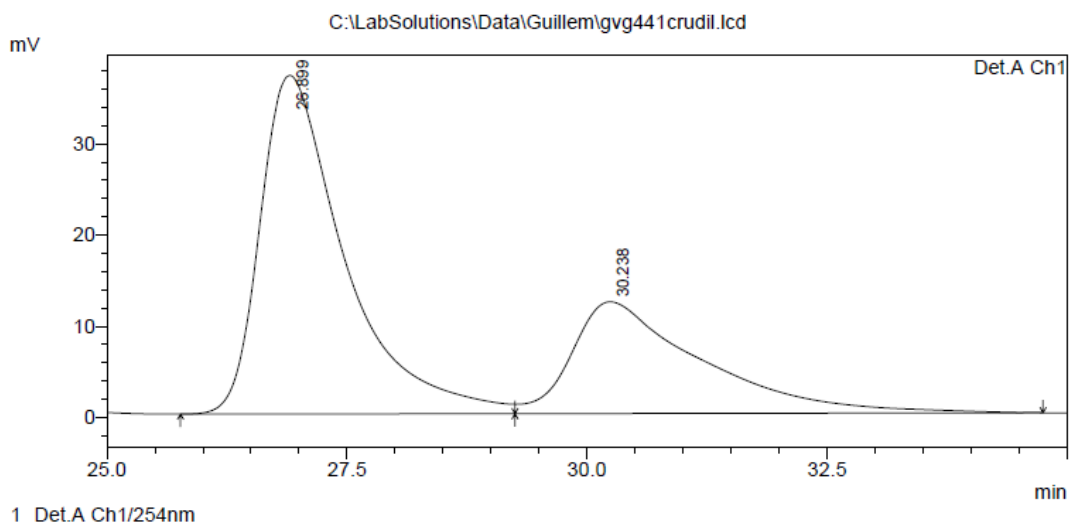

PeakTable

| Peak# | Ret. Time | Area    | Height | Area %  | Height % |
|-------|-----------|---------|--------|---------|----------|
| 1     | 26.899    | 2272789 | 37118  | 66.420  | 75.194   |
| 2     | 30.238    | 1149034 | 12245  | 33.580  | 24.806   |
| Total |           | 3421823 | 49363  | 100.000 | 100.000  |

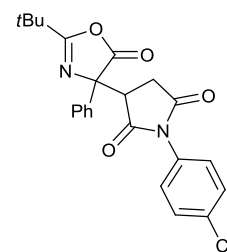

3-(2-(*tert*-Butyl)-5-oxo-4-phenyl-4,5-dihydrooxazol-4-yl)-1-(4-chlorophenyl)pyrrolidine-2,5-dione (**3e**)

<sup>1</sup>H-NMR

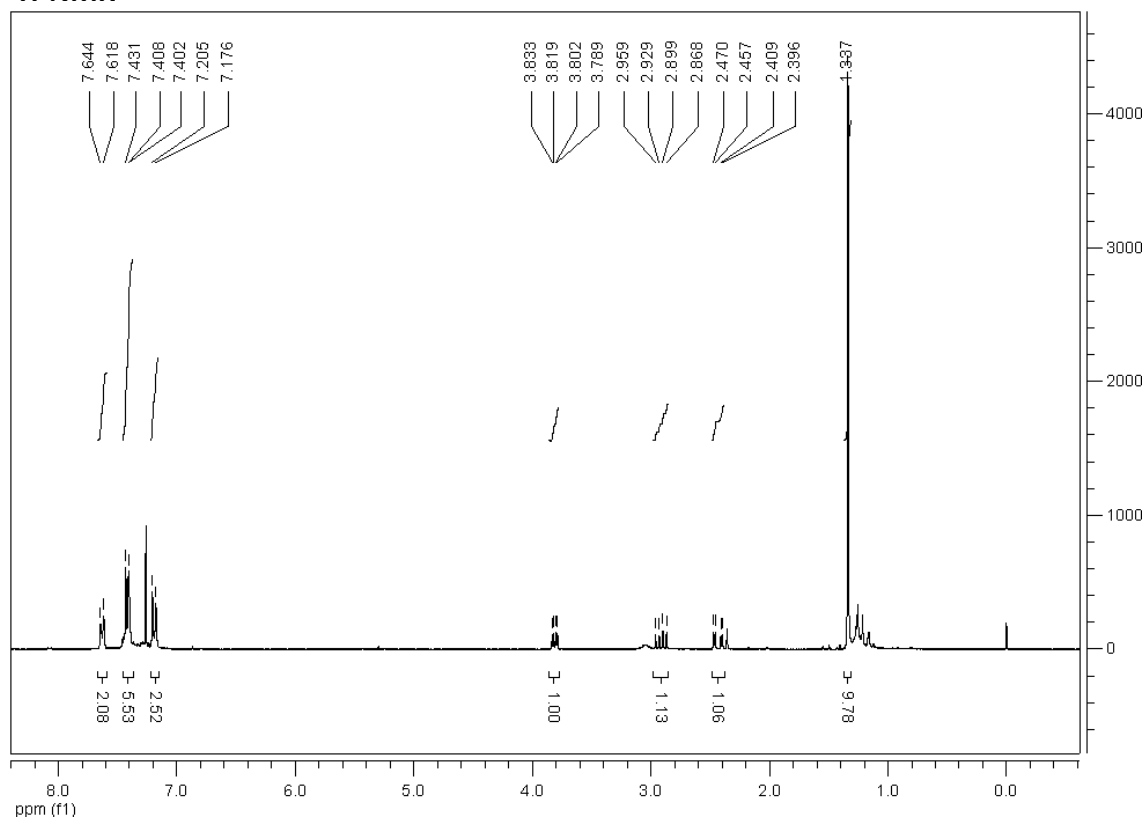

<sup>13</sup>C-NMR

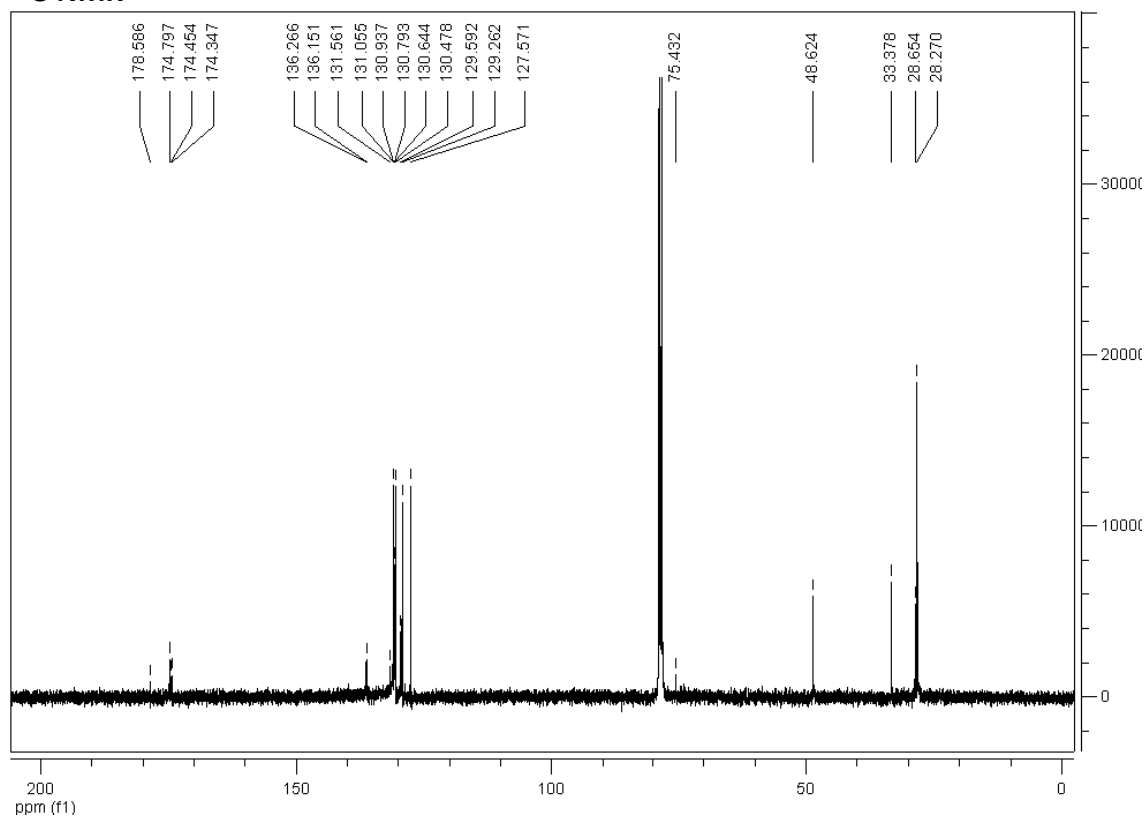

### HPLC:

Racemic:

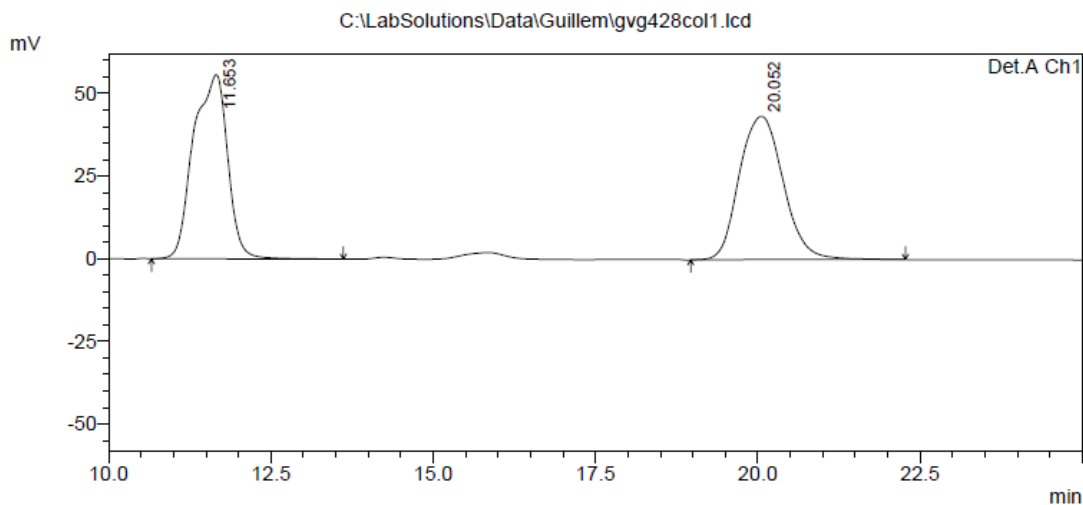

1 Det.A Ch1/254nm

PeakTable

Detector A Ch1 254nm

| Peak# | Ret. Time | Area    | Height | Area %  | Height % |
|-------|-----------|---------|--------|---------|----------|
| 1     | 11.653    | 2034951 | 55783  | 49.977  | 56.283   |
| 2     | 20.052    | 2036830 | 43328  | 50.023  | 43.717   |
| Total |           | 4071780 | 99110  | 100.000 | 100.000  |

Chiral:

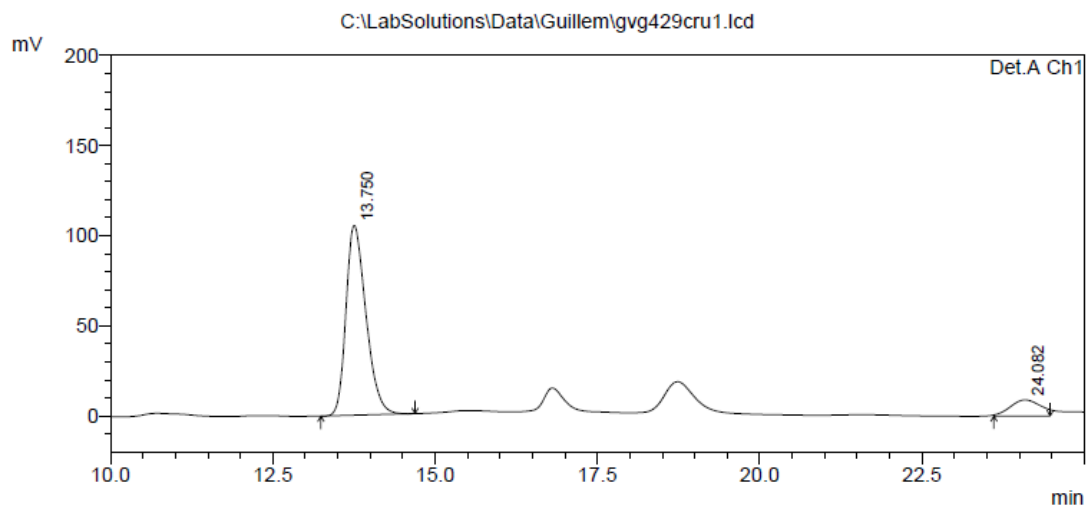

1 Det.A Ch1/254nm

PeakTable

Detector A Ch1 254nm

| Peak# | Ret. Time | Area    | Height | Area %  | Height % |
|-------|-----------|---------|--------|---------|----------|
| 1     | 13.750    | 2257284 | 105225 | 88.724  | 92.226   |
| 2     | 24.082    | 286891  | 8870   | 11.276  | 7.774    |
| Total |           | 2544176 | 114095 | 100.000 | 100.000  |

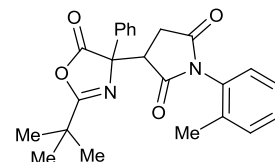

3-(2-*tert*-Butyl-5-oxo-4-phenyl-4,5-dihydrooxazol-4-yl)-1-*o*-tolylpyrrolidine-2,5-dione (**3f**)

<sup>1</sup>H-NMR

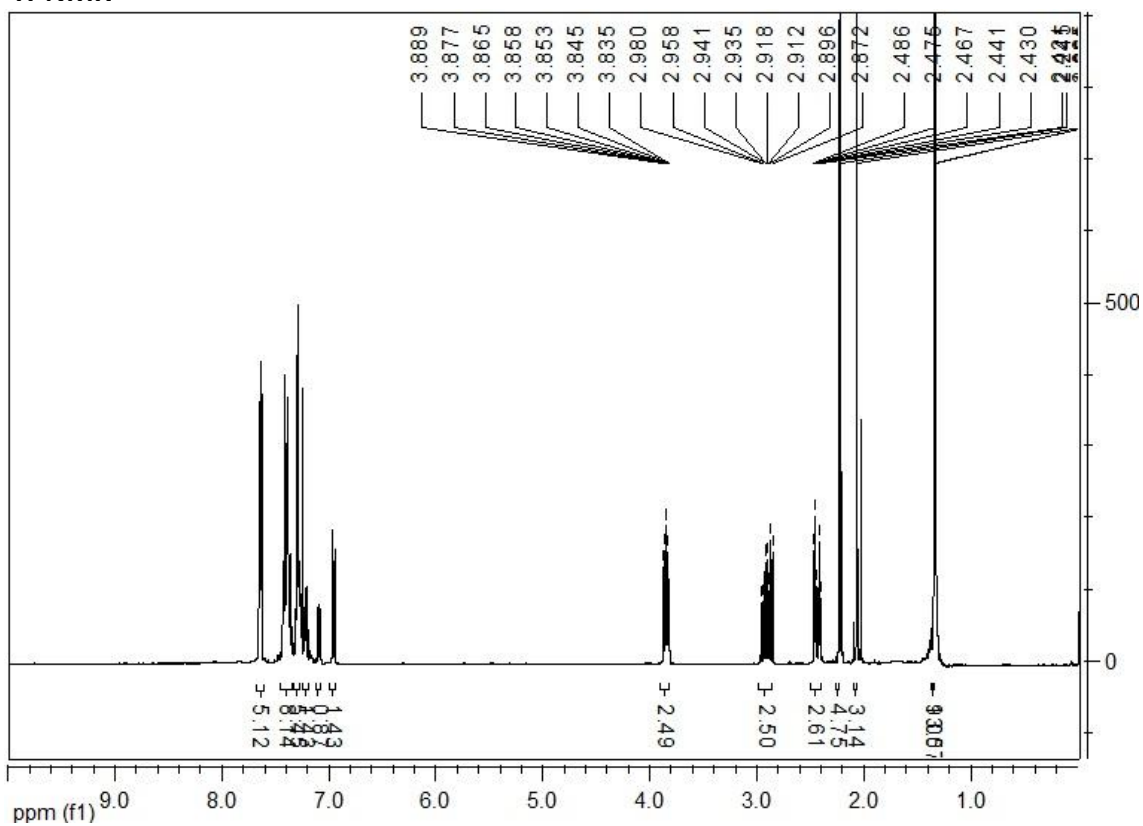

<sup>13</sup>C-NMR

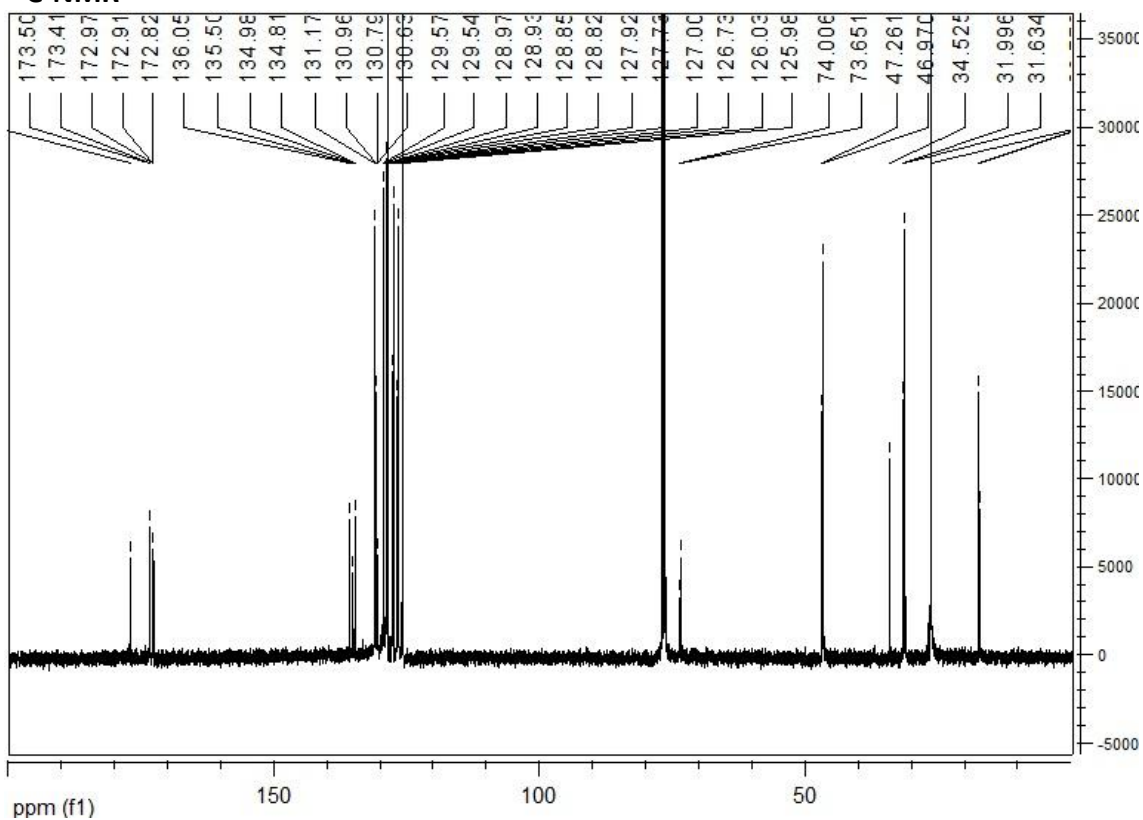

### HPLC

Racemic:

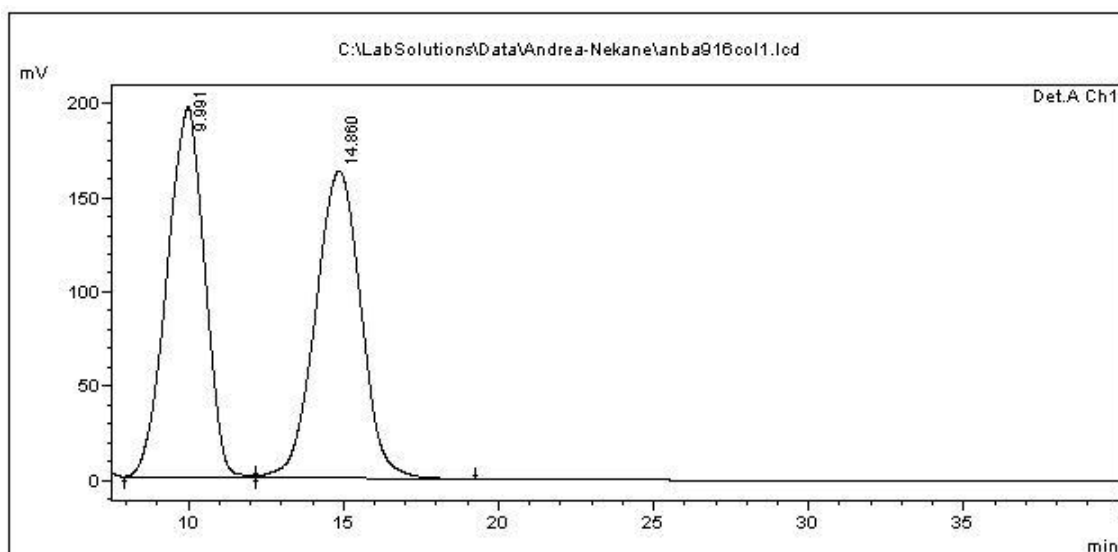

PeakTable

Detector A Ch1 254nm

| Peak# | Ret. Time | Area     | Area %  |
|-------|-----------|----------|---------|
| 1     | 9.991     | 16549924 | 49.892  |
| 2     | 14.860    | 16621398 | 50.108  |
| Total |           | 33171322 | 100.000 |

Chiral:

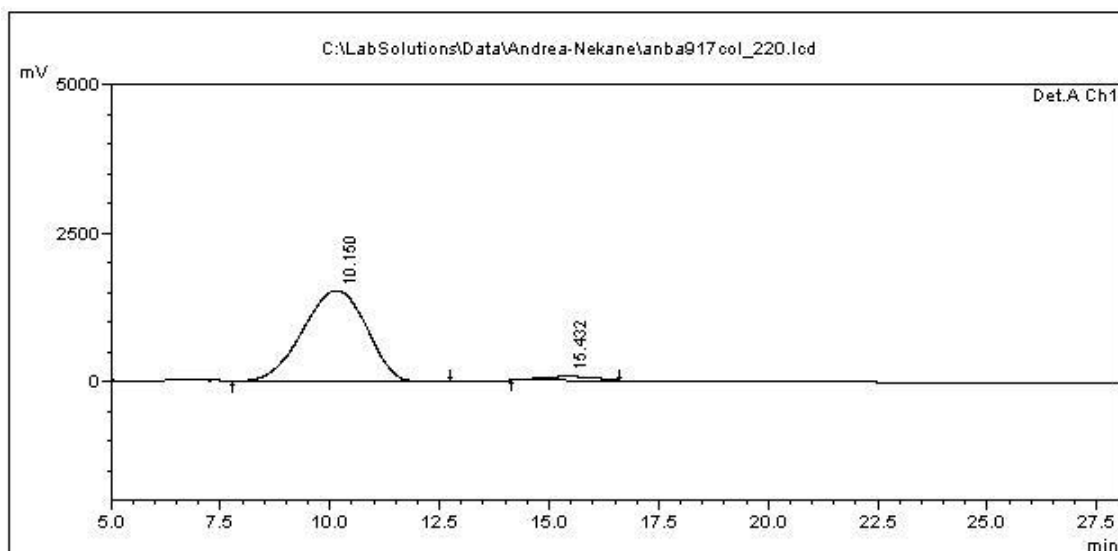

PeakTable

Detector A Ch1 220nm

| Peak# | Ret. Time | Area      | Area %  |
|-------|-----------|-----------|---------|
| 1     | 10.150    | 156291279 | 96.543  |
| 2     | 15.432    | 5596091   | 3.457   |
| Total |           | 161887370 | 100.000 |

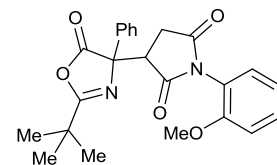

3-(2-*tert*-Butyl-5-oxo-4-phenyl-4,5-dihydrooxazol-4-yl)-1-(2-methoxyphenyl)pyrrolidine-2,5-dione (**3g**)

<sup>1</sup>H-NMR

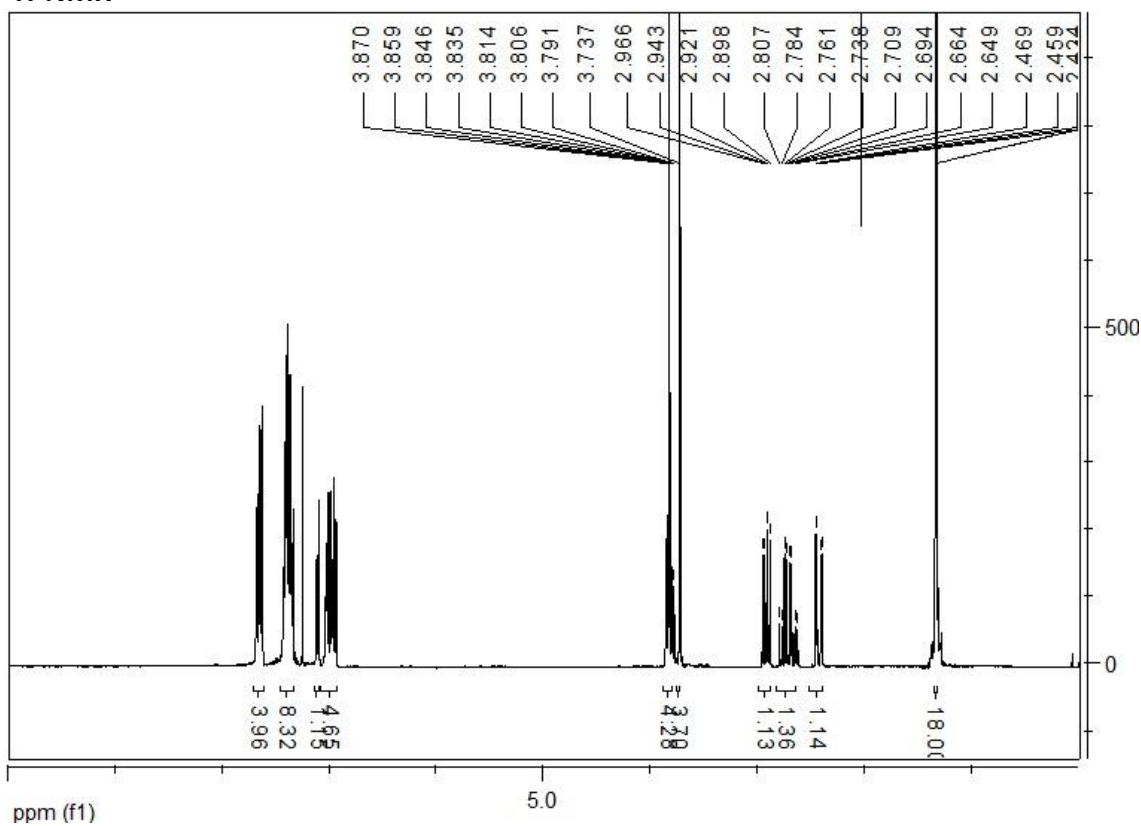

<sup>13</sup>C-NMR



HPLC  
Racemic:

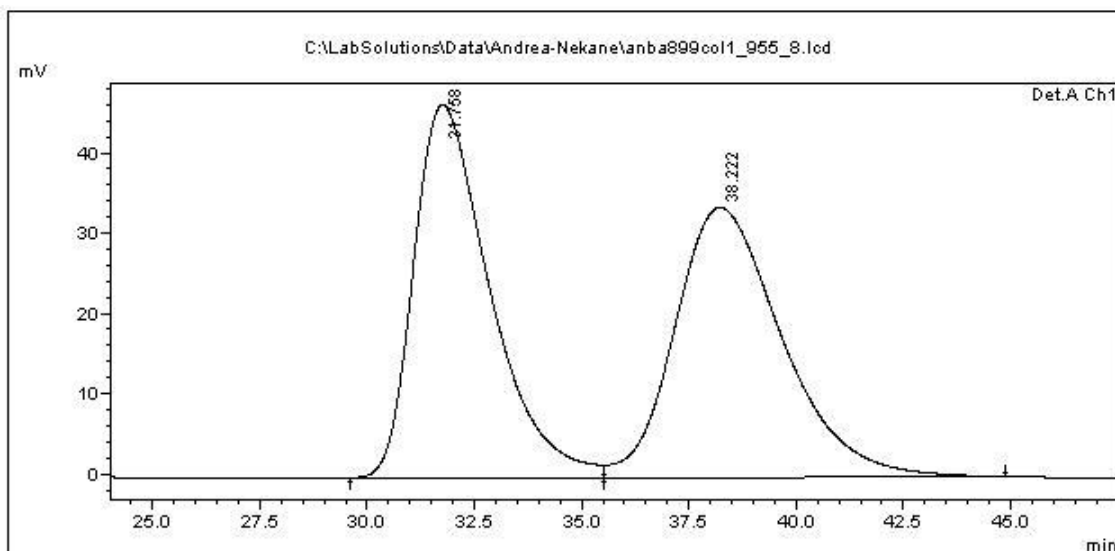

PeakTable

Detector A Ch1 254nm

| Peak# | Ret. Time | Area     | Area %  |
|-------|-----------|----------|---------|
| 1     | 31.758    | 5709153  | 49.523  |
| 2     | 38.222    | 5819225  | 50.477  |
| Total |           | 11528378 | 100.000 |

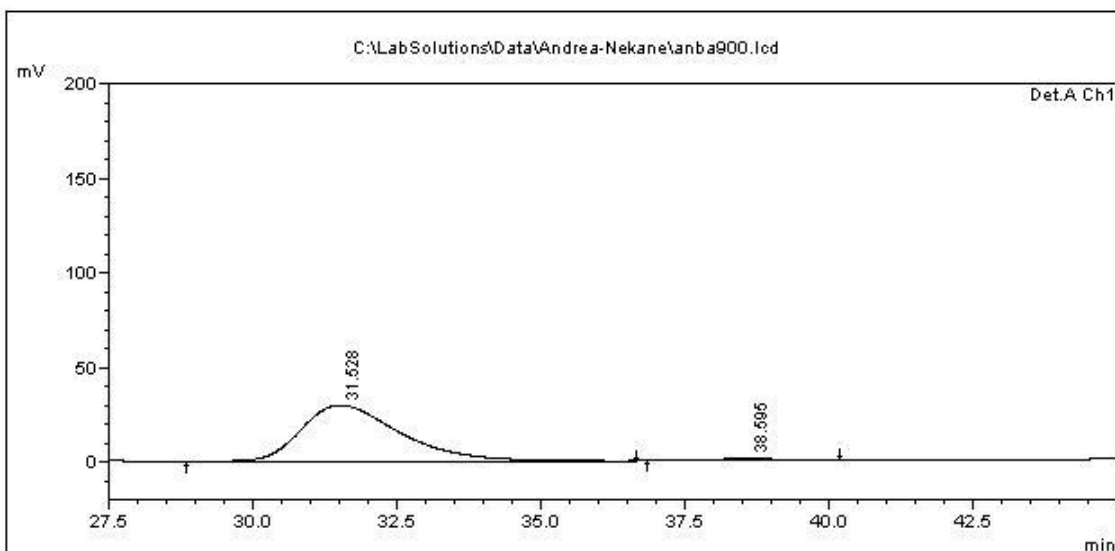

PeakTable

Detector A Ch1 254nm

| Peak# | Ret. Time | Area    | Area %  |
|-------|-----------|---------|---------|
| 1     | 31.528    | 3694459 | 97.542  |
| 2     | 38.595    | 93111   | 2.458   |
| Total |           | 3787570 | 100.000 |

3-(2-*tert*-Butyl-5-oxo-4-phenyl-4,5-dihydrooxazol-4-yl)-1-(3-chlorophenyl)pyrrolidine-2,5-dione (**3i**)

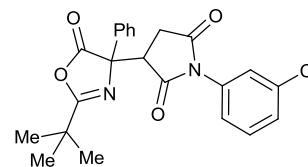

<sup>1</sup>H-NMR

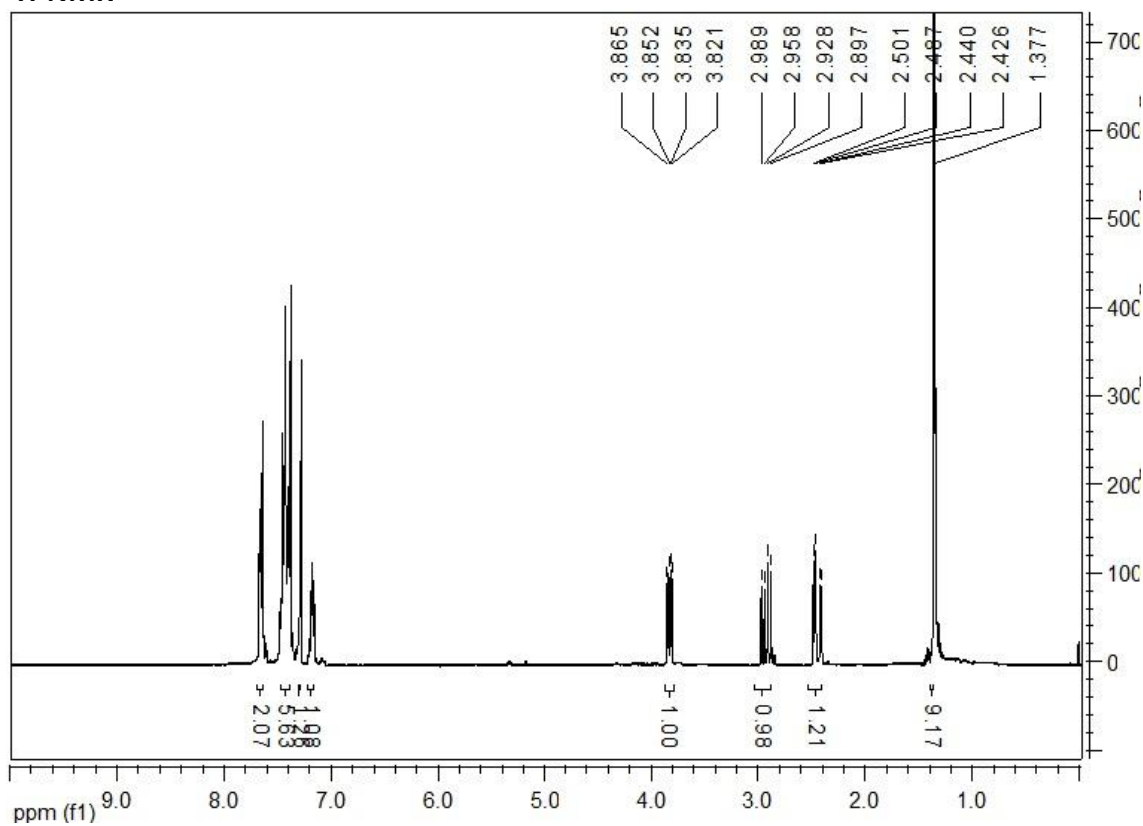

<sup>13</sup>C-NMR

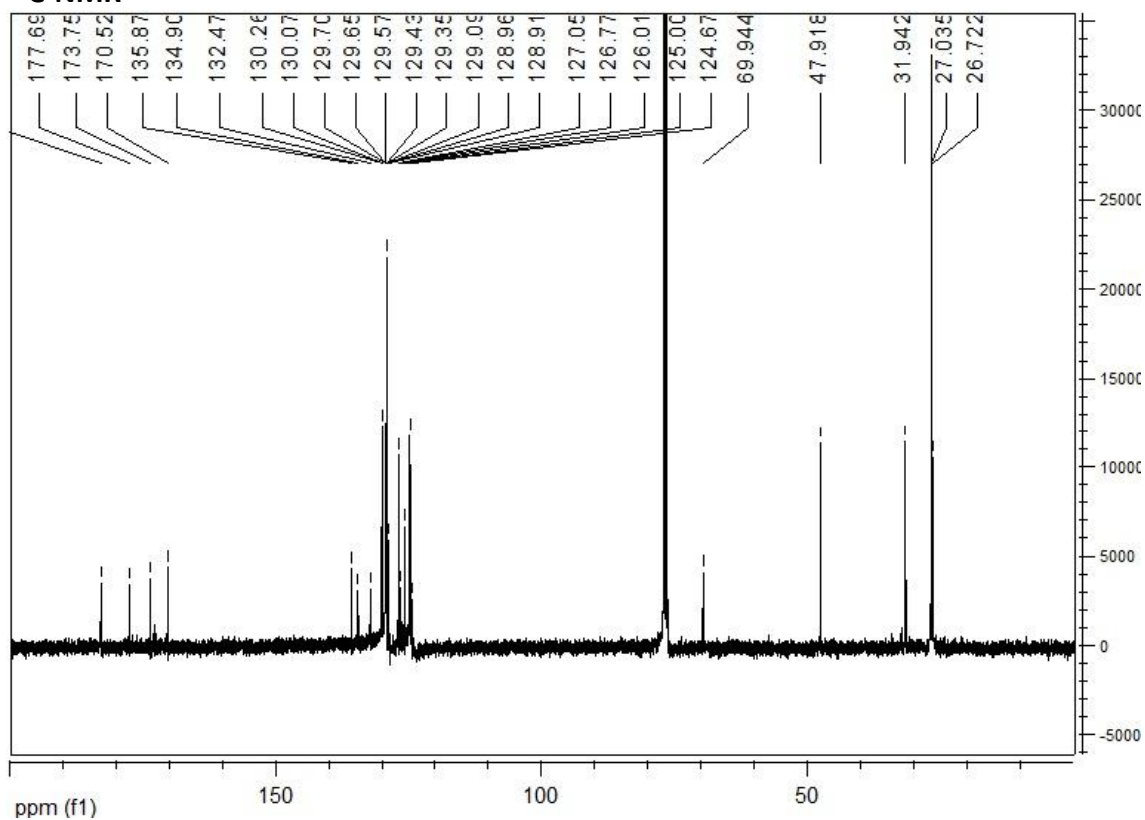



## HPLC

Racemic:

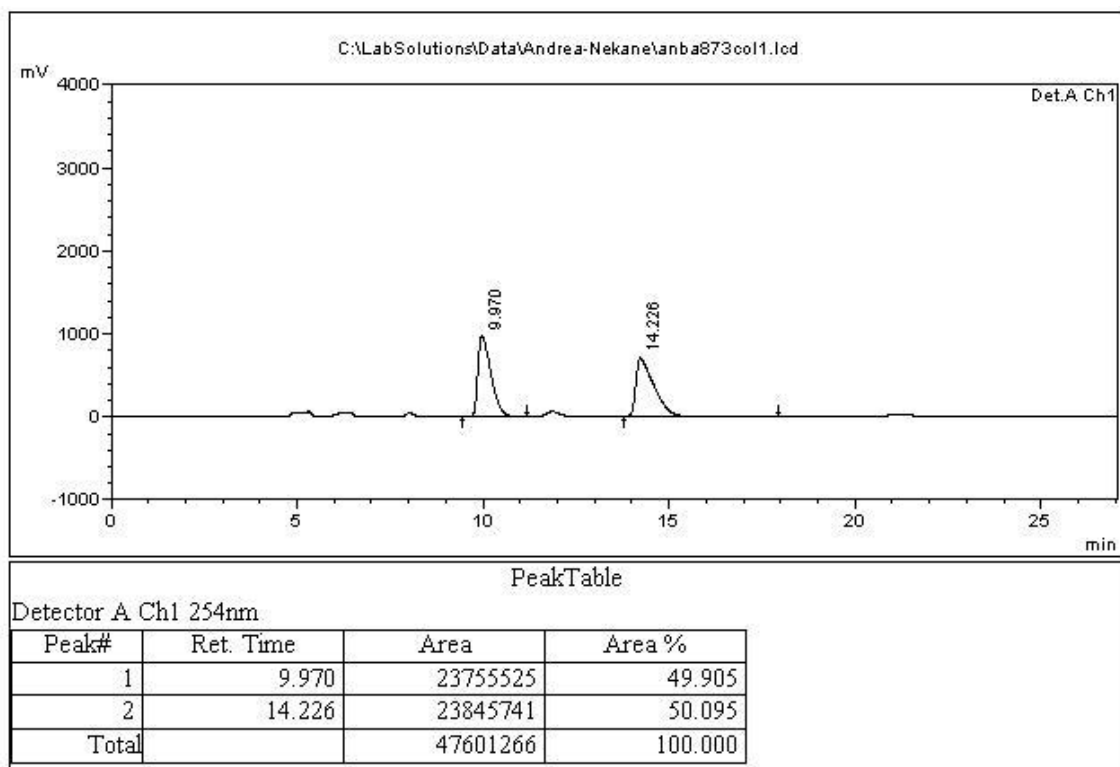

Chiral:

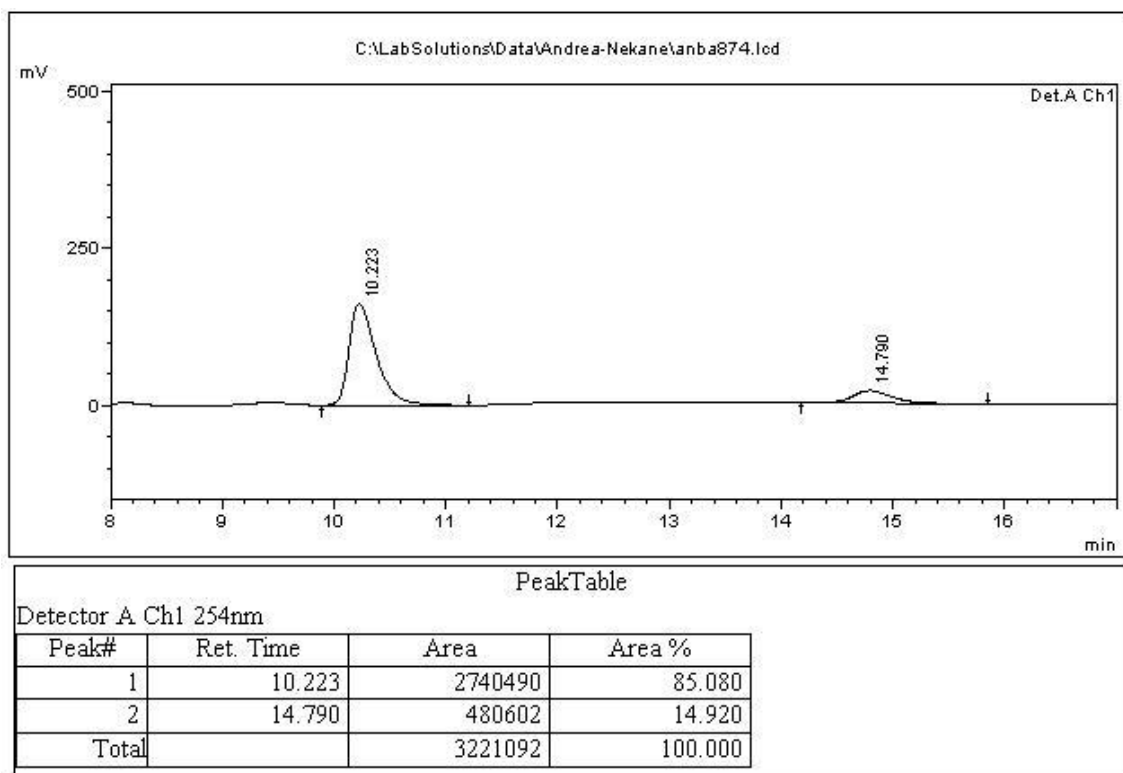

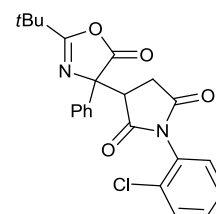

3-(2-(*tert*-Butyl)-5-oxo-4-phenyl-4,5-dihydrooxazol-4-yl)-1-(2-chlorophenyl)pyrrolidine-2,5-dione (**3h**)

<sup>1</sup>H-NMR

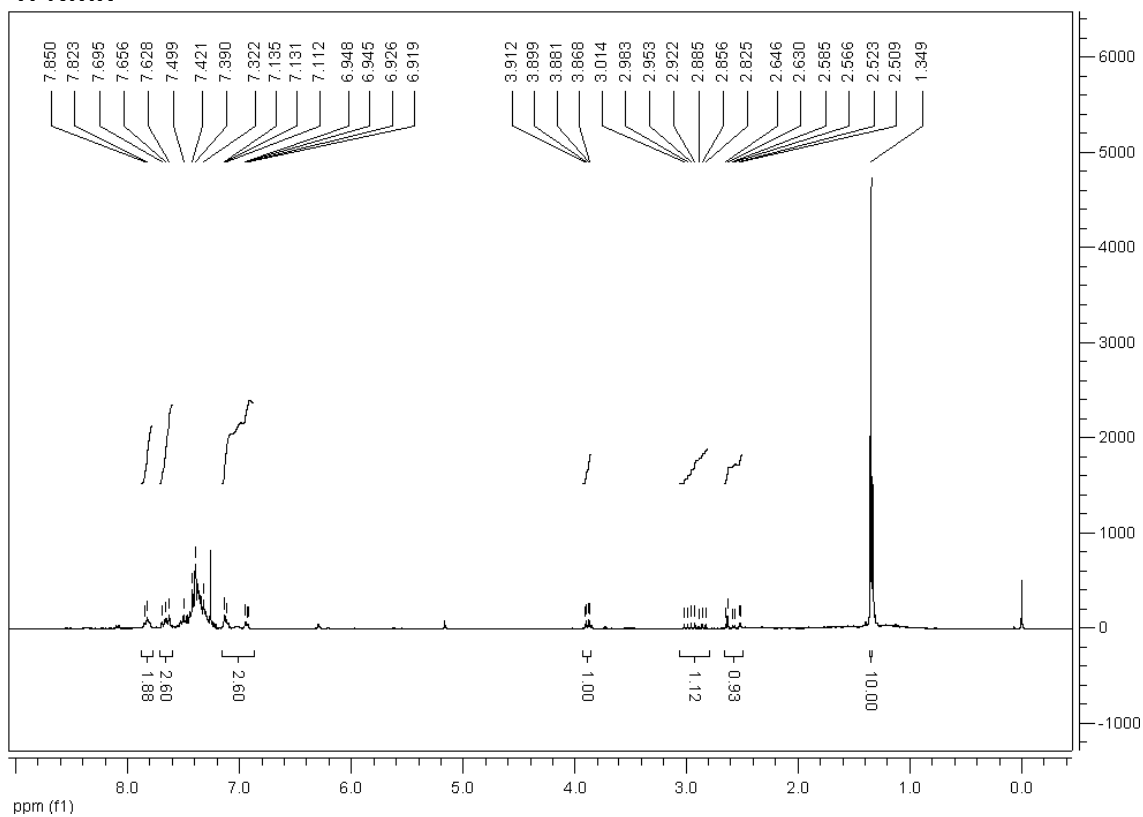

<sup>13</sup>C-NMR

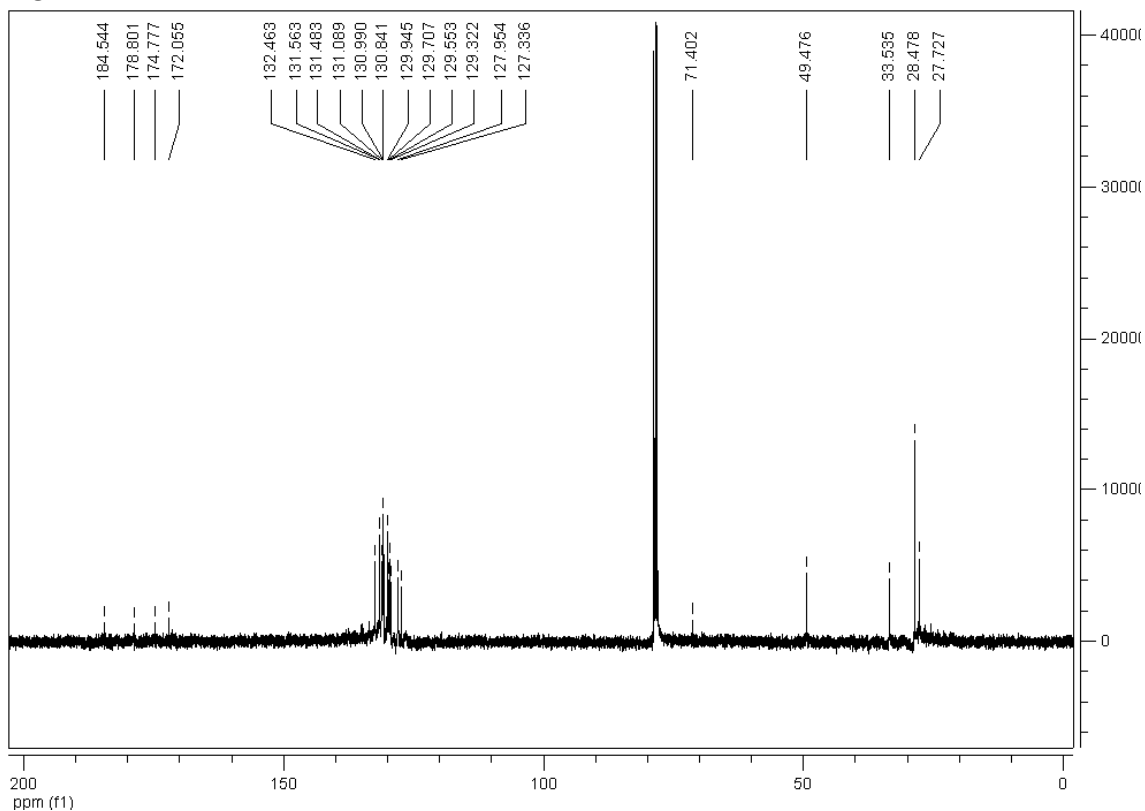

## HPLC

Racemic:

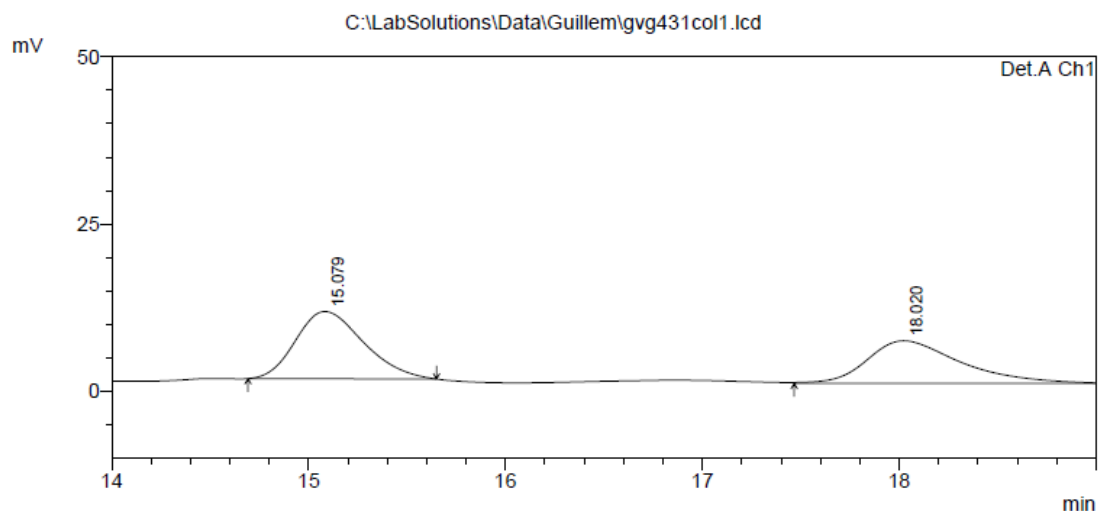

PeakTable

Detector A Ch1 254nm

| Peak# | Ret. Time | Area   | Height | Area %  | Height % |
|-------|-----------|--------|--------|---------|----------|
| 1     | 15.079    | 241477 | 10067  | 53.341  | 61.263   |
| 2     | 18.020    | 211225 | 6366   | 46.659  | 38.737   |
| Total |           | 452702 | 16433  | 100.000 | 100.000  |

Chiral:

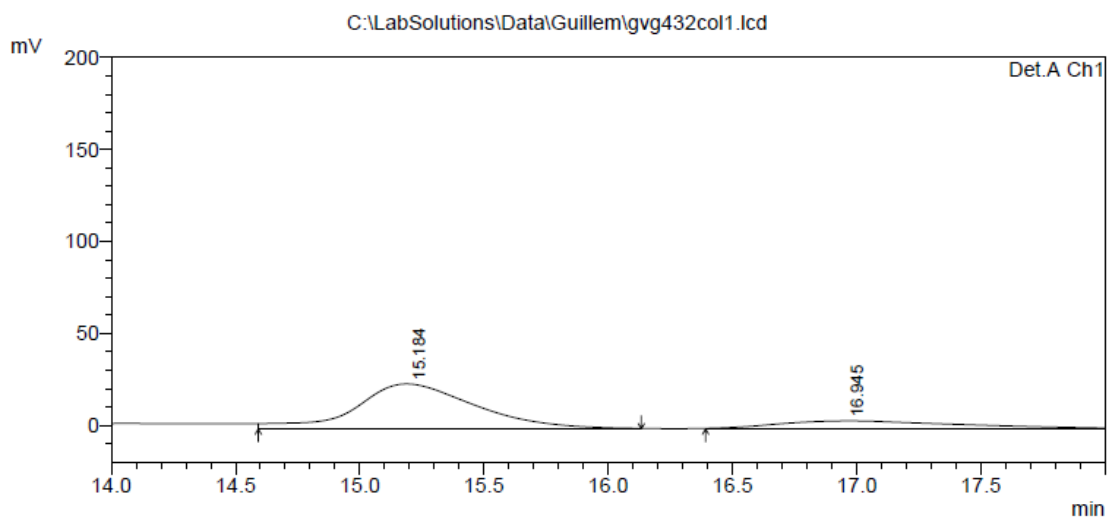

PeakTable

Detector A Ch1 254nm

| Peak# | Ret. Time | Area    | Height | Area %  | Height % |
|-------|-----------|---------|--------|---------|----------|
| 1     | 15.184    | 824603  | 24435  | 78.299  | 84.952   |
| 2     | 16.945    | 228544  | 4328   | 21.701  | 15.048   |
| Total |           | 1053147 | 28763  | 100.000 | 100.000  |

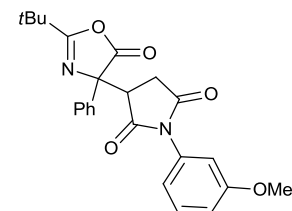

3-(2-(*tert*-Butyl)-5-oxo-4-phenyl-4,5-dihydrooxazol-4-yl)-1-(2-chlorophenyl)pyrrolidine-2,5-dione (**3j**)

### <sup>1</sup>H-NMR

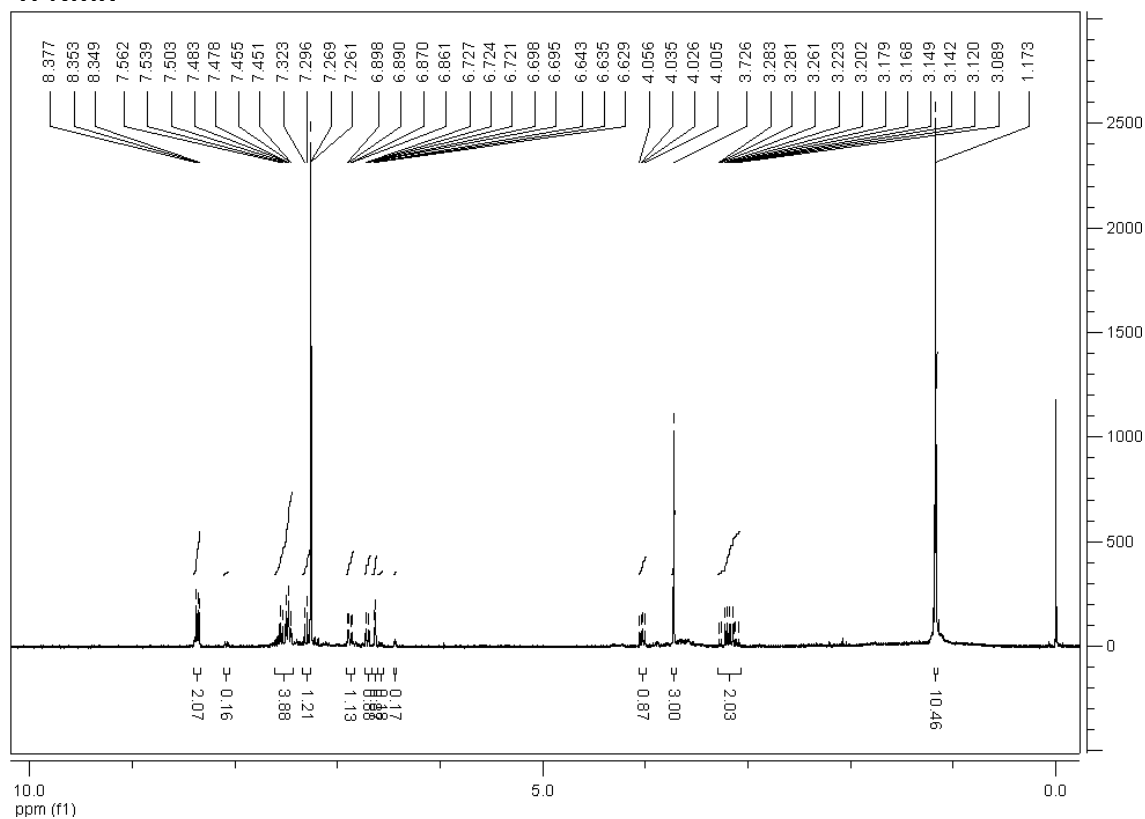

### <sup>13</sup>C-NMR

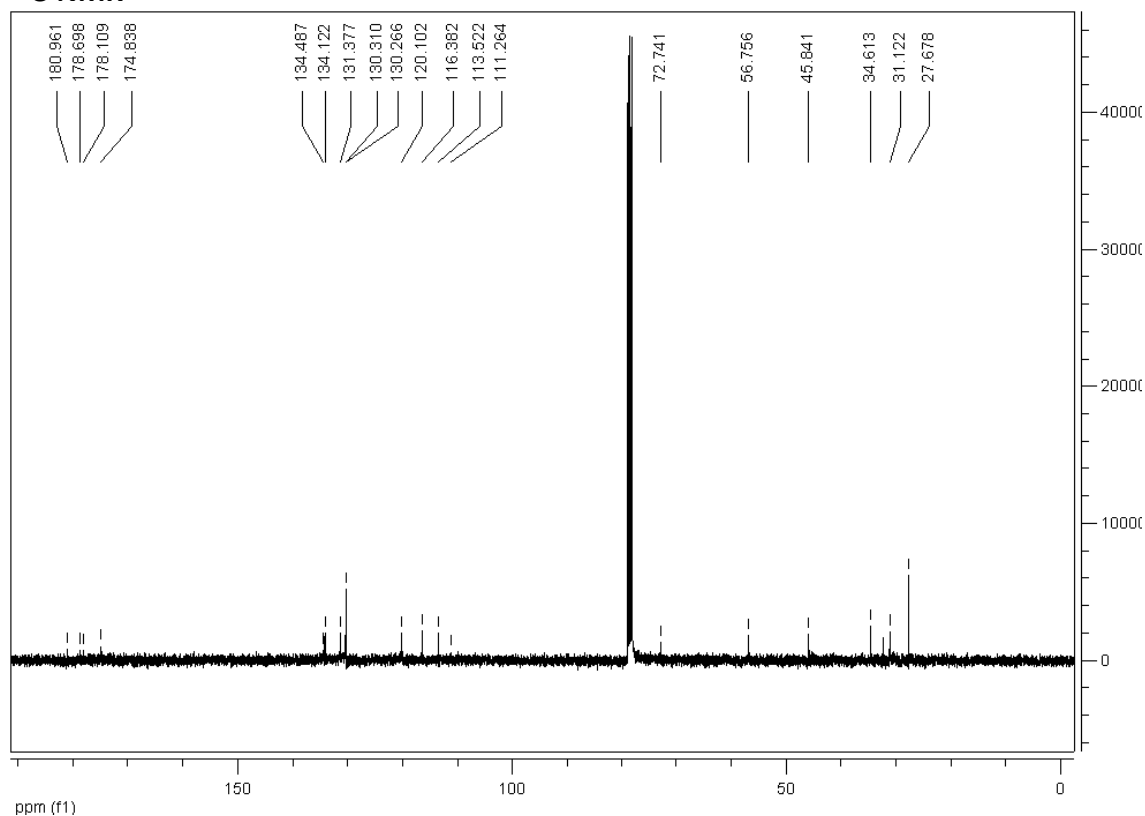

## HPLC

Racemic:

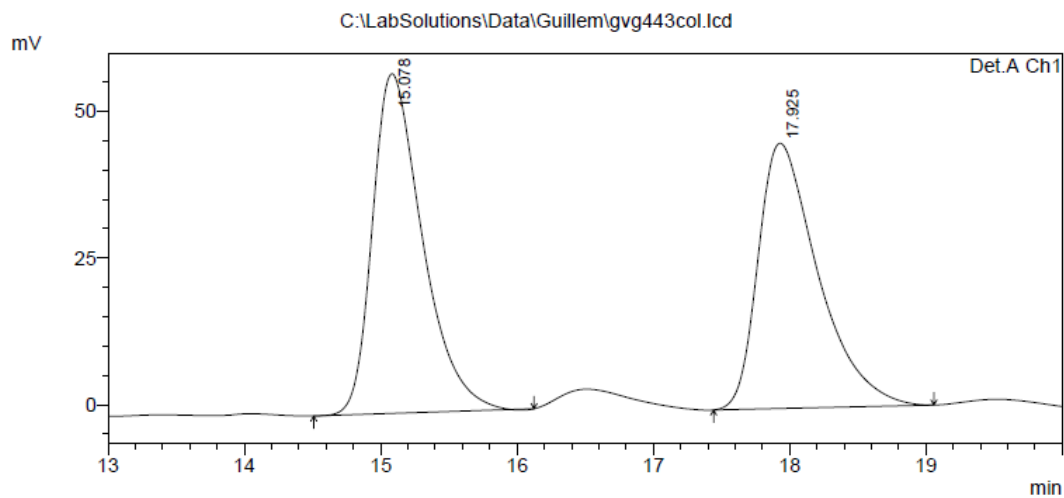

PeakTable

| Peak# | Ret. Time | Area    | Height | Area %  | Height % |
|-------|-----------|---------|--------|---------|----------|
| 1     | 15.078    | 1475842 | 57929  | 51.624  | 56.170   |
| 2     | 17.925    | 1382967 | 45202  | 48.376  | 43.830   |
| Total |           | 2858810 | 103132 | 100.000 | 100.000  |

Chiral:

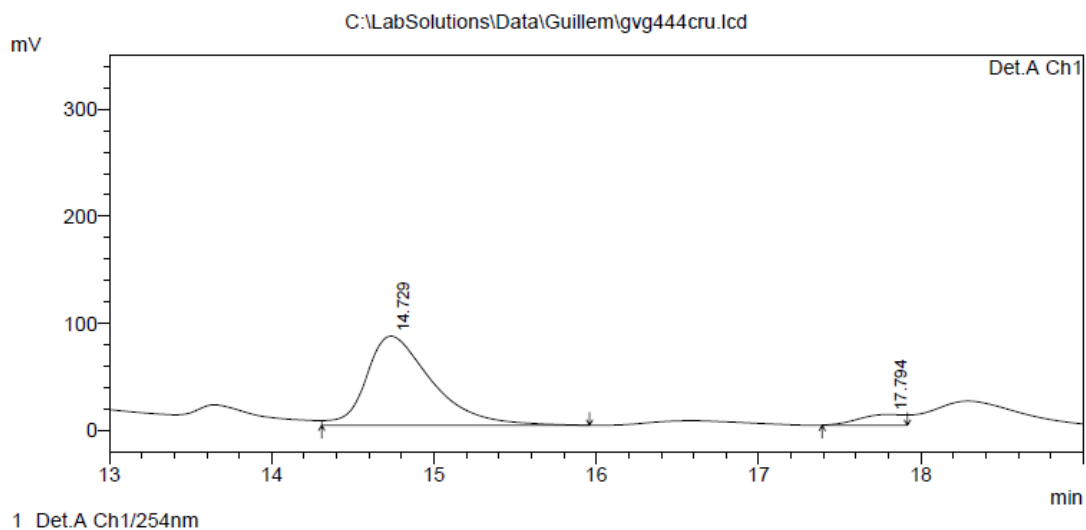

PeakTable

| Peak# | Ret. Time | Area    | Height | Area %  | Height % |
|-------|-----------|---------|--------|---------|----------|
| 1     | 14.729    | 2326004 | 83231  | 92.045  | 89.103   |
| 2     | 17.794    | 201032  | 10179  | 7.955   | 10.897   |
| Total |           | 2527036 | 93410  | 100.000 | 100.000  |

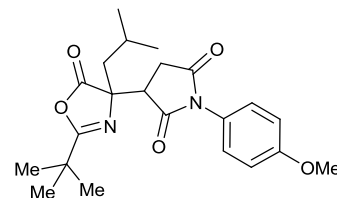

3-(2-*tert*-Butyl-4-isobutyl-5-oxo-4,5-dihydrooxazol-4-yl)-1-(4-methoxyphenyl)pyrrolidine-2,5-dione (**3k**)

### <sup>1</sup>H-NMR

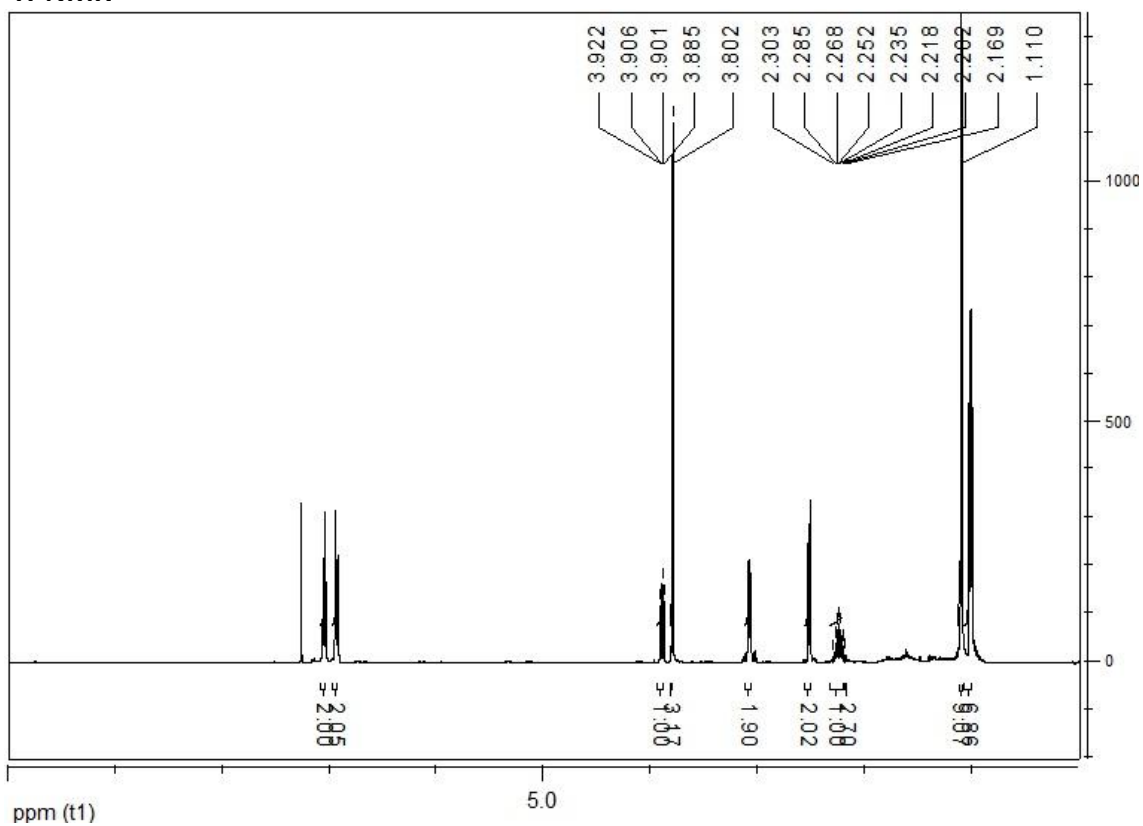

### <sup>13</sup>C-NMR

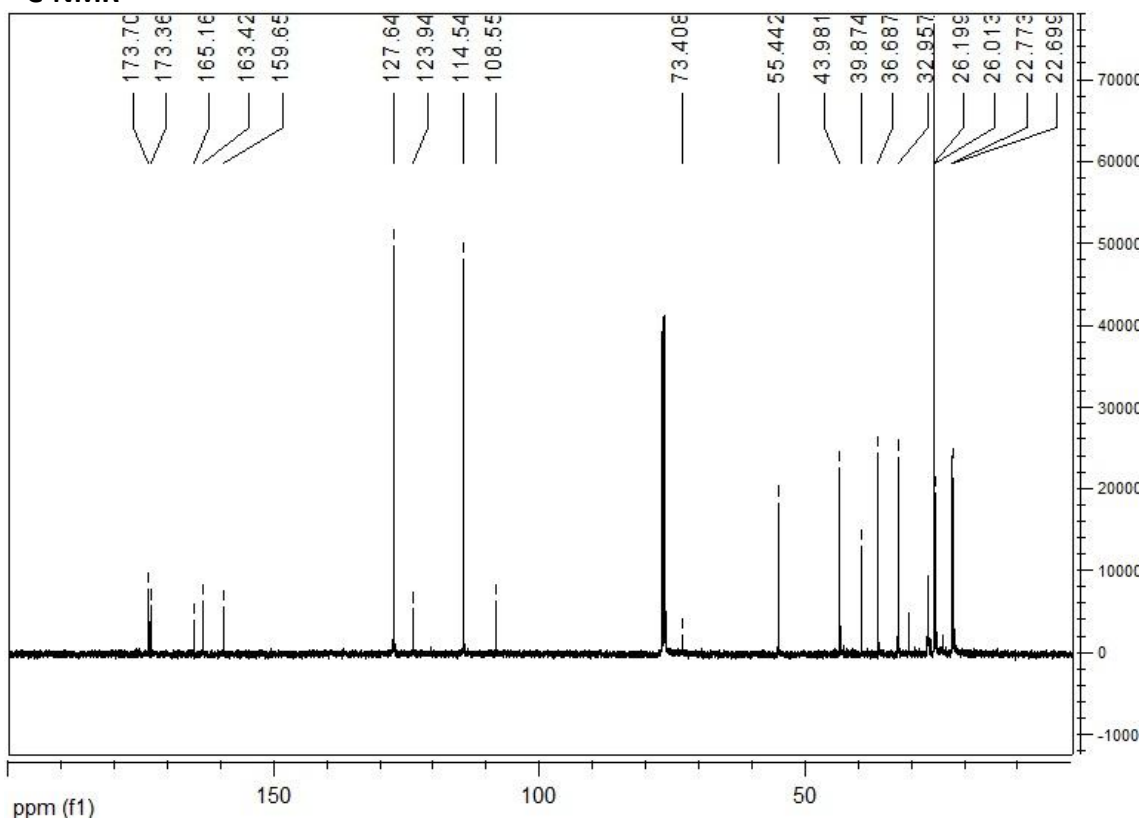

HPLC:

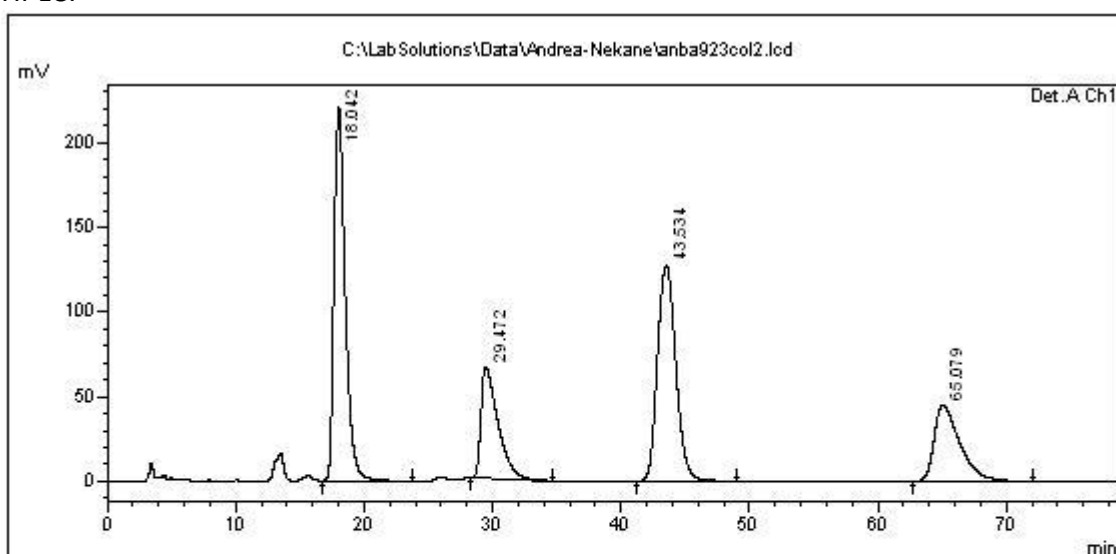

PeakTable

Detector A Ch1 254nm

| Peak# | Ret. Time | Area     | Area %  |
|-------|-----------|----------|---------|
| 1     | 18.042    | 13416726 | 34.884  |
| 2     | 29.472    | 6037895  | 15.699  |
| 3     | 43.534    | 12712920 | 33.054  |
| 4     | 65.079    | 6293454  | 16.363  |
| Total |           | 38460995 | 100.000 |

Chiral:

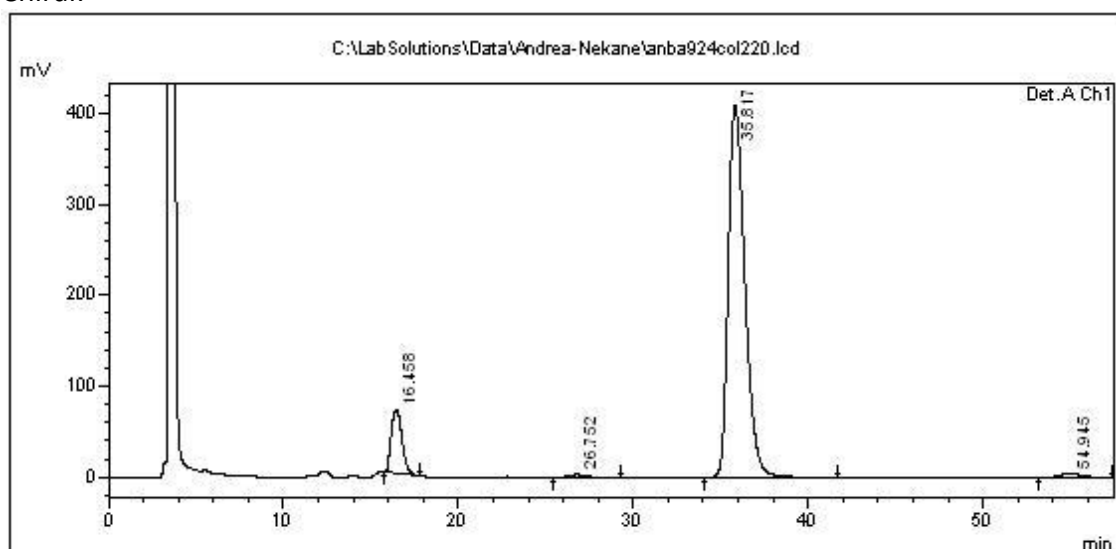

PeakTable

Detector A Ch1 220nm

| Peak# | Ret. Time | Area     | Area %  |
|-------|-----------|----------|---------|
| 1     | 16.458    | 3047723  | 9.886   |
| 2     | 26.752    | 236838   | 0.768   |
| 3     | 35.817    | 27119423 | 87.970  |
| 4     | 54.945    | 424120   | 1.376   |
| Total |           | 30828104 | 100.000 |

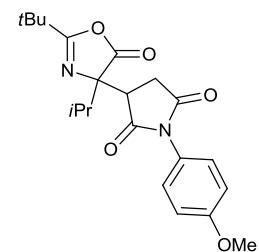

3-(2-(*tert*-Butyl)-4-isopropyl-5-oxo-4,5-dihydrooxazol-4-yl)-1-(4-methoxyphenyl)pyrrolidine-2,5-dione (**3I**)

<sup>1</sup>H-NMR

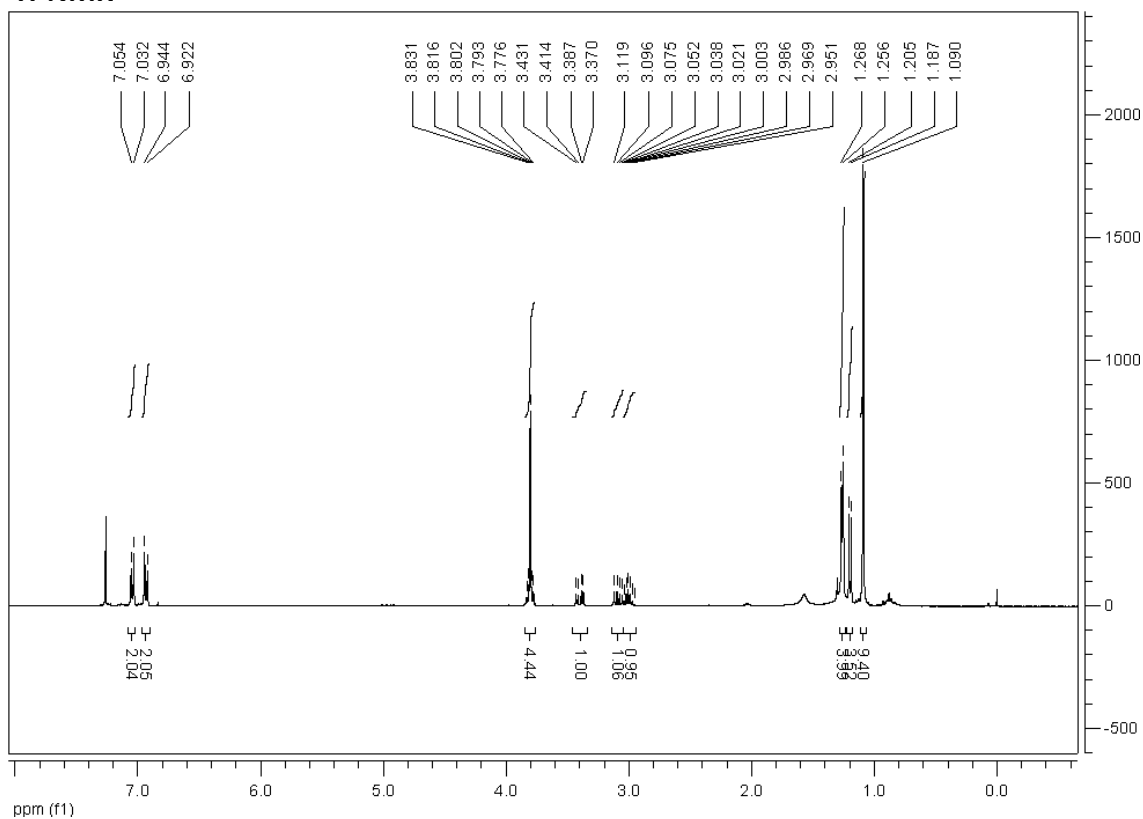

<sup>13</sup>C-NMR

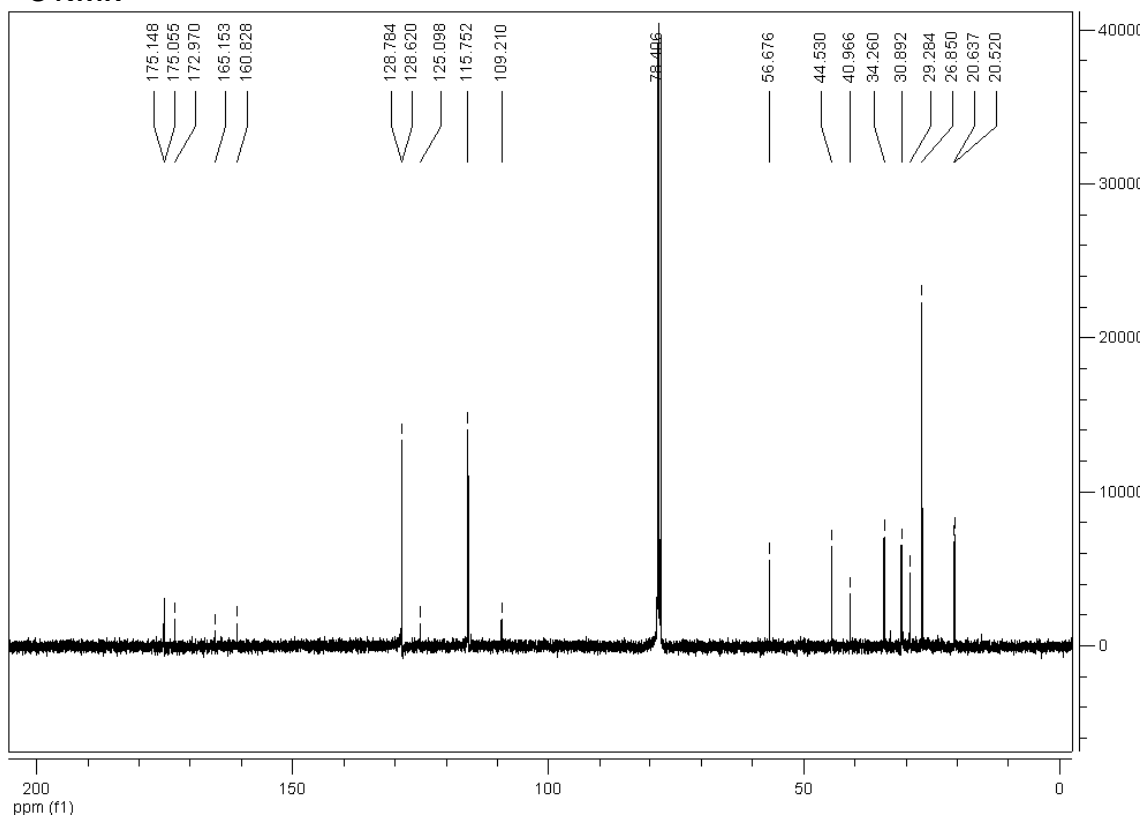



HPLC:

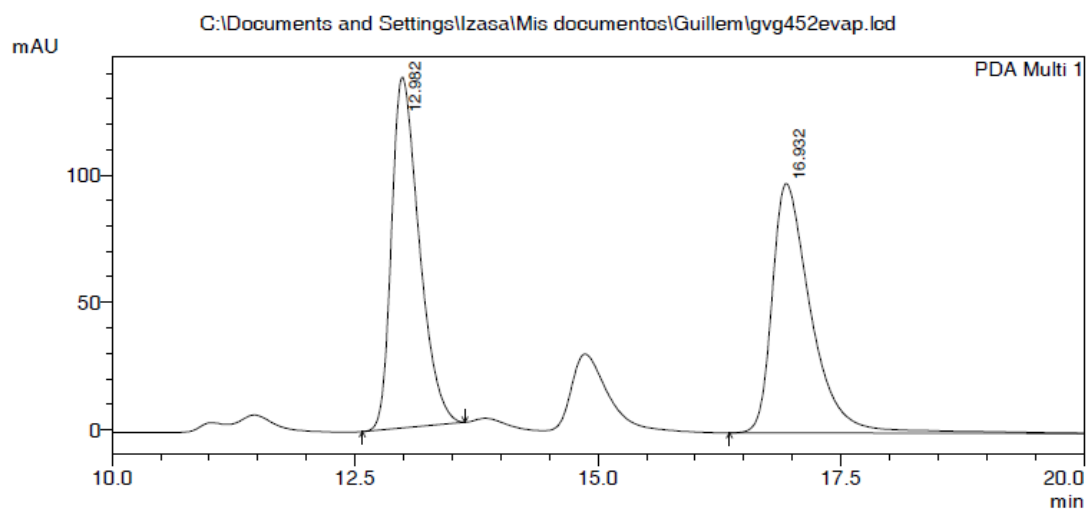

PeakTable

| Peak# | Ret. Time | Area    | Height | Area %  | Height % |
|-------|-----------|---------|--------|---------|----------|
| 1     | 12.982    | 2735078 | 137919 | 49.824  | 58.448   |
| 2     | 16.932    | 2754452 | 98051  | 50.176  | 41.552   |
| Total |           | 5489530 | 235969 | 100.000 | 100.000  |

Chiral:

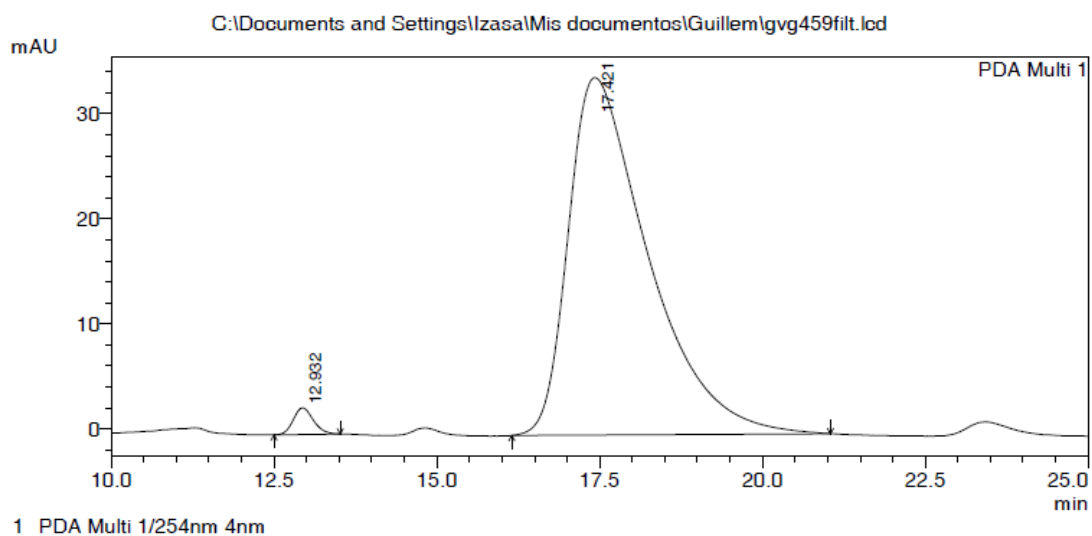

PeakTable

| Peak# | Ret. Time | Area    | Height | Area %  | Height % |
|-------|-----------|---------|--------|---------|----------|
| 1     | 12.932    | 54115   | 2530   | 1.830   | 6.928    |
| 2     | 17.421    | 2902537 | 33983  | 98.170  | 93.072   |
| Total |           | 2956653 | 36512  | 100.000 | 100.000  |

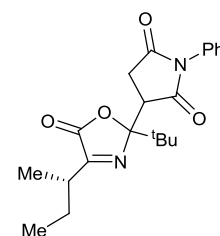

3-(4-*sec*-Butyl-2-*tert*-butyl-5-oxo-2,5-dihydrooxazol-2-yl)-1-phenylpyrrolidine-2,5-dione (**4m**)

### <sup>1</sup>H-NMR

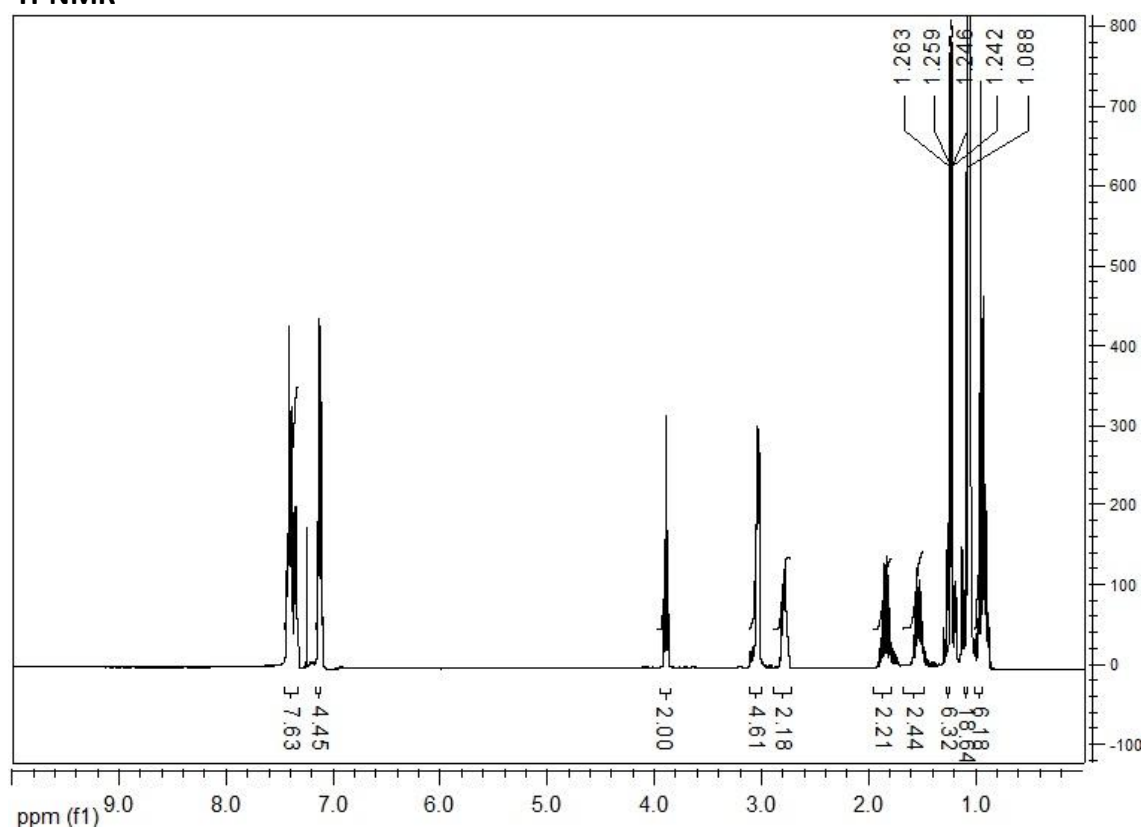

### <sup>13</sup>C-NMR

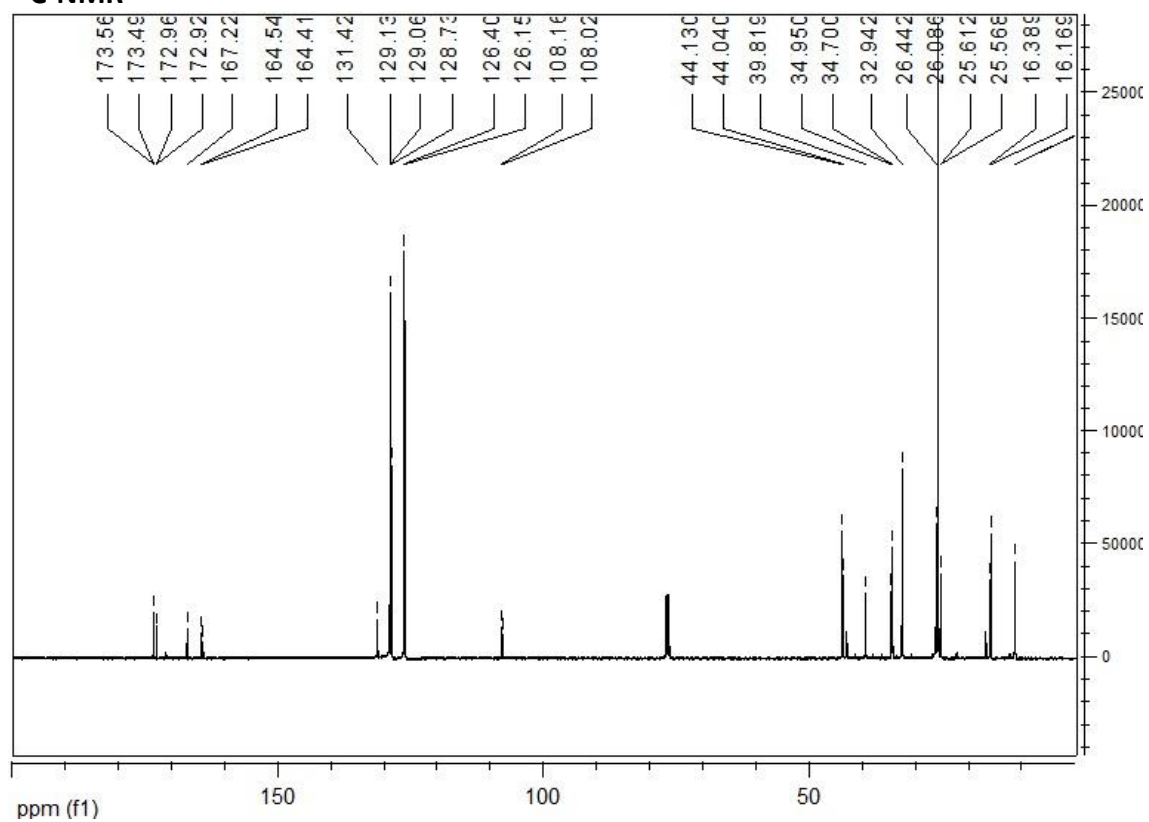

Supplement: c1nj20659a.pdf [file c1nj20659a.pdf]
